# Supplementary material
Source: publisher figshare collection journal article supplement (https://acs.figshare.com/ndownloader/files/4397392)

# Supporting Information

## Enantioselective Synthesis of $\alpha$ -Methyl Carboxylic Acids from Readily Available Starting Materials via Chemoenzymatic Dynamic Kinetic Resolution

Lisa K. Thalén,<sup>a</sup> Anna Sumic,<sup>a</sup> Krisztián Bogár,<sup>a,b</sup> Jakob Norinder,<sup>a</sup> Andreas K.  
Å. Persson,<sup>a</sup> and Jan-E. Bäckvall<sup>\*,a</sup>

<sup>a</sup>Stockholm University, Department of Organic Chemistry, Arrhenius Laboratory  
SE-106 91, Stockholm, Sweden

<sup>b</sup>Medicinal Chemistry, Discovery, AstraZeneca R&D Södertälje  
SE-151 85, Södertälje, Sweden

[jeb@organ.su.se](mailto:jeb@organ.su.se)

|           |                         |
|-----------|-------------------------|
| S2        | General                 |
| S2 – S8   | Experimental procedures |
| S9 – S18  | Copies of NMR spectra   |
| S19 – S28 | Copies of chromatograms |

## Experimental Section

**General:** Chemical shifts ( $\delta$ ) for  $^1\text{H}$  (400 or 300 MHz) and  $^{13}\text{C}$  (100 or 75 MHz) NMR spectra are reported in ppm, using residual  $\text{CHCl}_3$  (7.26 ppm and 77.16 ppm, respectively) or tetramethylsilane as internal standards. Chiral chromatography analyses were performed by HPLC or GC. For HPLC, Chiralcel OD-H and Chiralcel AD columns (0.46 cm  $\varnothing$  \* 25 cm) were used, flowrate 0.5 mL/min, unless stated in the text. For GC a CP-Chirasil-Dex CB column (25 m  $\varnothing$  \* 0.32 mm) was used, carrier gas:  $\text{H}_2$ , flowrate: 1.8 mL/min. GC program: isothermal at 100 °C for 5 min, then 4 °C/min until 200° C and thereafter isothermal at 200 °C for 5 min. Silica gel 60 (240-400 mesh) was used for flash chromatography and analytical thin-layer chromatography was performed on precoated silica gel 60-F<sub>254</sub> plates. All experiments were performed by standard Schlenk techniques under an argon atmosphere. Unless otherwise noted, all materials were obtained from commercial suppliers and used without further purification. Diethyl ether and THF were dried with a solvent purifier.

**Characterization of cross-coupling products 5a-5f obtained in the copper-catalyzed allylic substitution reactions.**

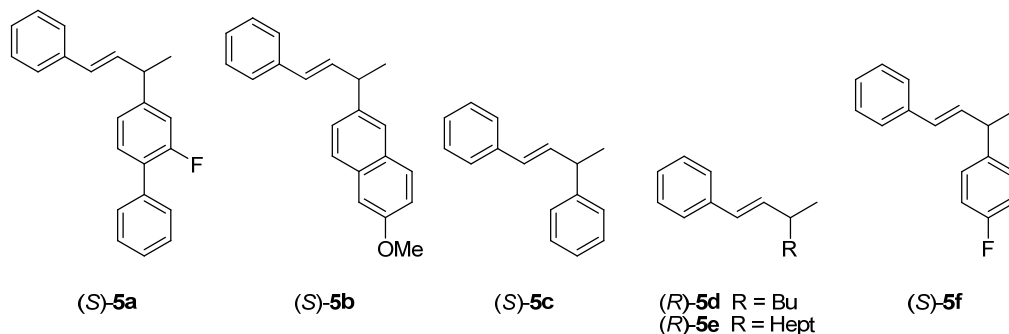Supporting information for olefins (*S*)-**5c**, (*R*)-**5d**, and (*R*)-**5d** was previously reported.<sup>1</sup>

**((rac)-1-phenyl-3-(3-fluoro-4-phenyl)phenyl-1-butene ((rac)-5a).** (*rac*)-**5a** was obtained in 97% yield. HPLC analysis (OJ column, *i*-hexane:*i*-PrOH, 85:15; flow 1.0,  $t_r(S) = 13.6$  min,  $t_r(R) = 18.6$  min).  $^1\text{H-NMR}$  (400 MHz,  $\text{CDCl}_3$ ):  $\delta$  7.67-7.61 (m, 2H), 7.56-7.36 (m, 8H), 7.34-7.27 (m, 1H), 7.24-7.13 (m, 2H), 6.56 (d,  $J = 16.0$  Hz, 1H), 6.46 (dd,  $J = 16.0, 6.6$  Hz, 1H), 3.76 (dq,  $J = 7.3, 6.6$  Hz, 1H), 1.58 (d,  $J = 7.3$  Hz, 3H).  $^{13}\text{C NMR}$  (100 MHz,  $\text{CDCl}_3$ ):  $\delta$  159.9 (d,  $J_{\text{C-F}} = 247.9$  Hz), 147.4 (d,  $J_{\text{C-F}} = 7.3$  Hz), 137.4, 135.9, 134.3, 130.7 (d,  $J_{\text{C-F}} = 4.0$  Hz), 129.2, 129.0 (d,  $J_{\text{C-F}} = 3.1$  Hz), 128.6 (d,  $J_{\text{C-F}} = 12.9$  Hz), 127.5 (d,  $J_{\text{C-F}} = 22.9$  Hz), 126.9 (d,  $J_{\text{C-F}} = 13.5$  Hz), 126.3, 123.4 (d,  $J_{\text{C-F}} = 3.3$  Hz), 114.93 (d,  $J_{\text{C-F}} = 23.1$  Hz), 42.2, 21.1.  $^{19}\text{F NMR}$  (376 MHz,  $\text{CDCl}_3$ )  $\delta$  -118.11. HRMS ( $m/z$ ) calculated for  $\text{C}_{22}\text{H}_{19}\text{FNa}^+$  ( $\text{M}+\text{Na}$ ),<sup>+</sup> 325.1363; found 325.1373.

**(R)-(+)-1-phenyl-3-(3-fluoro-4-phenyl)phenyl-1-butene ((R)-5a).** (R)-5a was obtained in 97% yield and >99% ee.  $[\alpha]_{\text{D}}^{27} = +38.6$  ( $c = 1.00$ ,  $(\text{CH}_3)_2\text{CO}$ ). The optical purity was

determined by HPLC analysis (OJ column, *i*-hexane:*i*-PrOH, 85:15; flow 1.0,  $t_r(S)$  = 13.6 min,  $t_r(R)$  = 18.6 min).

**(*S*)-(-)-1-phenyl-3-(3-fluoro-4-phenyl)phenyl-1-butene ((*S*)-5a).** (*S*)-5a was obtained in 92% yield and >99% ee. The optical purity was determined by HPLC analysis (OJ column, *i*-hexane:*i*-PrOH, 85:15; flow 1.0,  $t_r(S)$  = 13.6 min,  $t_r(R)$  = 18.6 min). NMR spectral data were in accordance with published data.<sup>2</sup>  $[\alpha]_D^{27}$  = -39.2 ( $c$  = 1.00, (CH<sub>3</sub>)<sub>2</sub>CO).

**(*rac*)-1-phenyl-3-(6-methoxy-2-naphtyl)-1-butene ((*rac*)-5b).** (*rac*)-5b was obtained in 98% yield. HPLC analysis (OJ column, *i*-hexane:*i*-PrOH, 85:15; flow 1.0,  $t_r(R)$  = 25.35,  $t_r(S)$  = 29.71 min). <sup>1</sup>H-NMR (400 MHz, CDCl<sub>3</sub>):  $\delta$  7.75-7.69 (m, 2H), 7.67-7.63 (m, 1H), 7.43-7.37 (m, 3H), 7.34-7.27 (m, 2H), 7.25-7.19 (m, 1H), 7.18-7.13 (m, 2H), 6.49-6.46 (m, 2H), 3.94 (s, 3H), 3.84-3.76 (m, 1H), 1.57 (d,  $J$  = 6.7 Hz, 3H). <sup>13</sup>C NMR (100 MHz, CDCl<sub>3</sub>):  $\delta$  157.4, 140.8, 137.6, 135.4, 133.3, 129.2, 129.1, 128.7, 128.5, 127.1, 127.0, 126.8, 126.2, 125.1, 118.7, 105.7, 55.3, 42.5, 21.2. C<sub>21</sub>H<sub>20</sub>ONa<sup>+</sup> (M+Na)<sup>+</sup> 311.1406; found 311.1411.

**(*R*)-(+)-1-phenyl-3-(6-methoxy-2-naphtyl)-1-butene((*R*)-5b).** (*R*)-5b was obtained in 99% ee and > 99% ee. The optical purity was determined by HPLC analysis (OJ column, *i*-hexane:*i*-PrOH, 85:15; flow 1.0,  $t_r(R)$  = 25.35,  $t_r(S)$  = 29.71 min).  $[\alpha]_D^{27}$  = +38 ( $c$  = 1.00, (CH<sub>3</sub>)<sub>2</sub>CO)

**(*S*)-(-)-1-phenyl-3-(6-methoxy-2-naphtyl)-1-butene ((*S*)-5b).** (*S*)-5b was obtained in 98% yield and > 99% ee. The optical purity was determined by HPLC analysis (OJ column, *i*-hexane:*i*-PrOH, 85:15; flow 1.0,  $t_r(R)$  = 24.67,  $t_r(S)$  = 28.62 min).  $[\alpha]_D^{27}$  = -37 ( $c$  = 1.00, (CH<sub>3</sub>)<sub>2</sub>CO)

**(rac)-1,3-diphenyl-1-butene ((rac)-5c).** (rac)-5c was obtained in 78% yield. NMR spectral data were in accordance with published data.<sup>3</sup> HPLC analysis (OJ column, *i*-hexane:*i*-PrOH, 99:1,  $t_r(R) = 95.54$ ,  $t_r(S) = 105.44$  min). <sup>1</sup>H-NMR (400 MHz, CDCl<sub>3</sub>):  $\delta$  7.41-7.20 (m, 10 H), 6.48-6.38 (m, 2H), 3.68 (dq,  $J = 7.4$ , 7.0 Hz, 1 H), 1.50 (d,  $J = 7.0$  Hz). <sup>13</sup>C NMR (100 MHz, CDCl<sub>3</sub>):  $\delta$  145.7, 137.7, 135.4, 128.7, 128.6, 127.5, 127.2, 126.4, 126.3, 42.7, 21.4.

**(R)-(+)-1,3-diphenyl-1-butene ((R)-5c).** (R)-5c was obtained in 78% yield and >99% ee. The optical purity was determined by HPLC analysis (OJ column, *i*-hexane:*i*-PrOH, 99:1,  $t_r(R) = 95.54$ ,  $t_r(S) = 105.44$  min).  $[\alpha]_D^{27} = +37$  ( $c = 1.00$ , CHCl<sub>3</sub>)

**(S)-(-)-1,3-diphenyl-1-butene ((S)-5c).** (S)-5c was obtained in 79% yield and >99% ee. The optical purity was determined by HPLC analysis (OJ column, *i*-hexane:*i*-PrOH, 99:1,  $t_r(R) = 95.54$ ,  $t_r(S) = 105.44$  min).

**(rac)-1-phenyl-3-(4-fluorophenyl)-1-butene ((rac)-5f).** (rac)-5f was obtained in 95% yield. NMR spectral data were in accordance with published data.<sup>3</sup> <sup>1</sup>H-NMR (400 MHz, CDCl<sub>3</sub>):  $\delta$  7.42-7.21 (m, 7H), 7.07-6.99 (m, 2H), 6.46-6.33 (m, 2H), 3.66 (dq,  $J = 7.31$ , 6.92 Hz, 1 H), 1.48 (d,  $J = 6.92$  Hz, 3 H). <sup>13</sup>C NMR (100 MHz, CDCl<sub>3</sub>):  $\delta$  161.4 (d,  $J_{C-F} = 245$  Hz), 141.2 (d,  $J_{C-F} = 3.0$  Hz), 137.4, 135.0, 128.7 (d,  $J_{C-F} = 7.7$  Hz), 128.7, 128.6, 127.2, 126.2, 115.2 (d,  $J_{C-F} = 21.0$  Hz), 41.8, 21.3. <sup>19</sup>F NMR (376 MHz, CDCl<sub>3</sub>)  $\delta$  -117.2. HPLC analysis (OJ column, *i*-hexane:*i*-PrOH, 99:1,  $t_r(R) = 92.40$ ,  $t_r(S) = 81.59$  min).

**(R)-(+)-1-phenyl-3-(4-fluorophenyl)-1-butene ((R)-5f).** (R)-5f was obtained in 94% yield and >99% ee. NMR spectral data were in accordance with published data.<sup>3</sup> The optical purity

was determined by HPLC analysis (OJ column, *i*-hexane:*i*-PrOH, 99:1,  $t_r(R)$  = 92.40,  $t_r(S)$  = 81.59 min).  $[\alpha]_D^{27}$  = +33 ( $c$  = 1.00, CHCl<sub>3</sub>).

**(*S*)-(-)-1-phenyl-3-(4-fluorophenyl)-1-butene ((*S*)-5f).** (*S*)-5f was obtained in 97% yield and >99% ee. The optical purity was determined by HPLC analysis (OJ column, *i*-hexane:*i*-PrOH, 99:1,  $t_r(R)$  = 92.40,  $t_r(S)$  = 81.59 min).  $[\alpha]_D^{27}$  = -32 ( $c$  = 1.00, CHCl<sub>3</sub>).

#### Characterization of oxidation products 7a-7b.

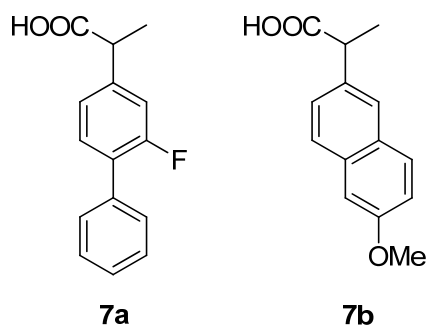

**(*rac*)-Flurbiprofen. (*rac*)-7a.** GC analysis (flow rate; 1.5 mL/min. GC program: From 100 °C to 200 °C at a rate of 10 °C/min, isothermal at 200 °C for 40 min;  $t_r(S)$  = 25.6,  $t_r(R)$  = 26.3 min). Spectroscopic data were in agreement with the literature data.<sup>4</sup>

#### **(*R*)-2-((3-fluoro-4-phenyl)phenyl)propionic acid ((*R*)-Flurbiprofen (*R*)-7a).**

**Method [A]** (*R*)-7a was obtained in 93% yield and >99% ee. The optical purity was determined by GC analysis (flow rate; 1.5 mL/min. GC program: From 100 °C to 200 °C at a rate of 10 °C/min, isothermal at 200 °C for 40 min;  $t_r(S)$  = 25.6,  $t_r(R)$  = 26.3 min).  $[\alpha]_D^{27}$  = -42.7 ( $c$  = 0.8, CDCl<sub>3</sub>). Spectroscopic data were in agreement with the literature data.<sup>4</sup>

**Method [B]** (*R*)-**7a** was obtained in 44% yield and >99% ee. The optical purity was determined by GC analysis (flow rate; 1.5 mL/min. GC program: From 100 °C to 200 °C at a rate of 10 °C/min, isothermal at 200 °C for 40 min;  $t_r(S) = 25.6$ ,  $t_r(R) = 26.3$  min).  $[\alpha]_D^{27} = -40.6$  ( $c = 0.5$ ,  $\text{CDCl}_3$ ). Spectroscopic data were in agreement with the literature data.<sup>4</sup>

**(S)-2-((3-fluoro-4-phenyl)phenyl)propionic acid ((S)-Flurbiprofen (S)-7a).**

**Method [A]** (*S*)-**7a** was obtained in 76% yield and >99% ee. The optical purity was determined by GC analysis (flow rate; 1.5 mL/min. GC program: From 100 °C to 200 °C at a rate of 10 °C/min, isothermal at 200 °C for 40 min;  $t_r(S) = 25.6$ ,  $t_r(R) = 26.3$  min).  $[\alpha]_D^{27} = +42.2$  ( $c = 1.0$ ,  $\text{CDCl}_3$ ). Spectroscopic data were in agreement with the literature data.<sup>4</sup>

**(S)-2-(6-methoxy-2-naphtyl)propionic acid ((S)-Naproxen, (S)-7b).**

**Method [B]** (*S*)-**7b** was obtained in 42% yield and >99% ee. The optical purity (>99% ee) was determined by GC analysis (flow rate; 1.5 mL/min. GC program: From 100 °C to 200 °C at a rate of 10 °C/min, isothermal at 200 °C for 40 min;  $t_r(S) = 28.5$ ,  $t_r(R) = 29.2$  min).  $[\alpha]_D^{27} = +60.8$  ( $c = 0.5$ ,  $\text{CDCl}_3$ ). Spectroscopic data were in agreement with the literature data.<sup>5</sup>

**Method [C]** (*S*)-**7b** was obtained in 51% yield and >99% ee. The optical purity (>99% ee) was determined by GC analysis (flow rate; 1.5 mL/min. GC program: From 100 °C to 200 °C at a rate of 10 °C/min, isothermal at 200 °C for 40 min;  $t_r(S) = 28.5$ ,  $t_r(R) = 29.2$  min). Spectroscopic data were in agreement with the literature data.<sup>5</sup>

## References

1. Norinder, J.; Bogar, K.; Kanupp, L.; Bäckvall, J.-E. *Org. Lett.* **2007**, 9, 5095–5098.
2. Rodriguez, D.; Perez Sestelo, J.; Sarandeses, L. A. *J. Org. Chem.* **2004**, 69, 8136–8139.
3. Mauleón, P.; Alonso, I.; Rivero, M. R.; Carretero, J. C. *J. Org. Chem.* **2007**, 72, 9924–9935.

4. Schlosser, M.; Geneste, H. *Chem. Eur. J.* **1998**, *4*, 1969–1973.
5. Boyd, E.; Coulbeck, E.; Coumbarides, G. S.; Chavda, S.; Dingjan, M.; Eames, J.; Flinn, A.; Motevalli, M.; Northen, J.; Yohannes, Y. *Tetrahedron: Asymmetry* **2007**, *18*, 2515–2530.



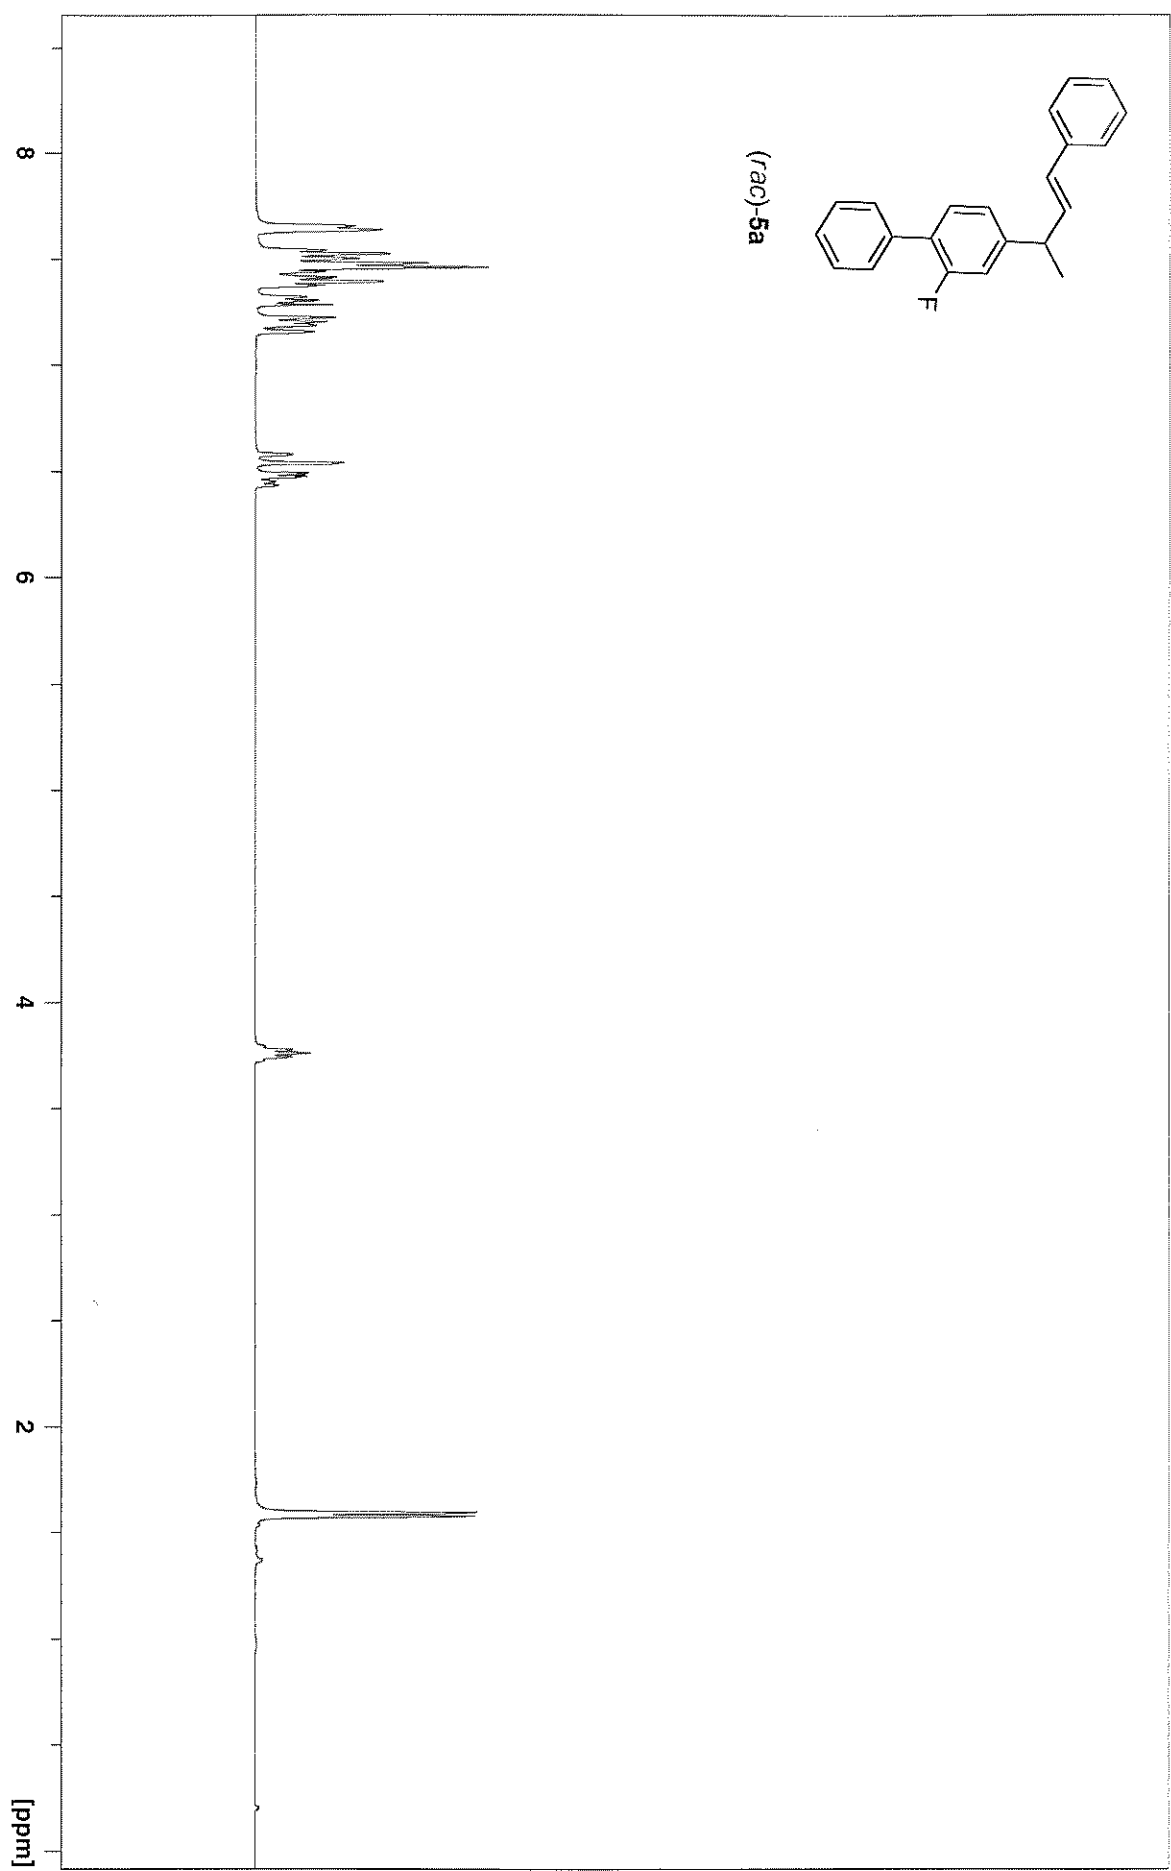

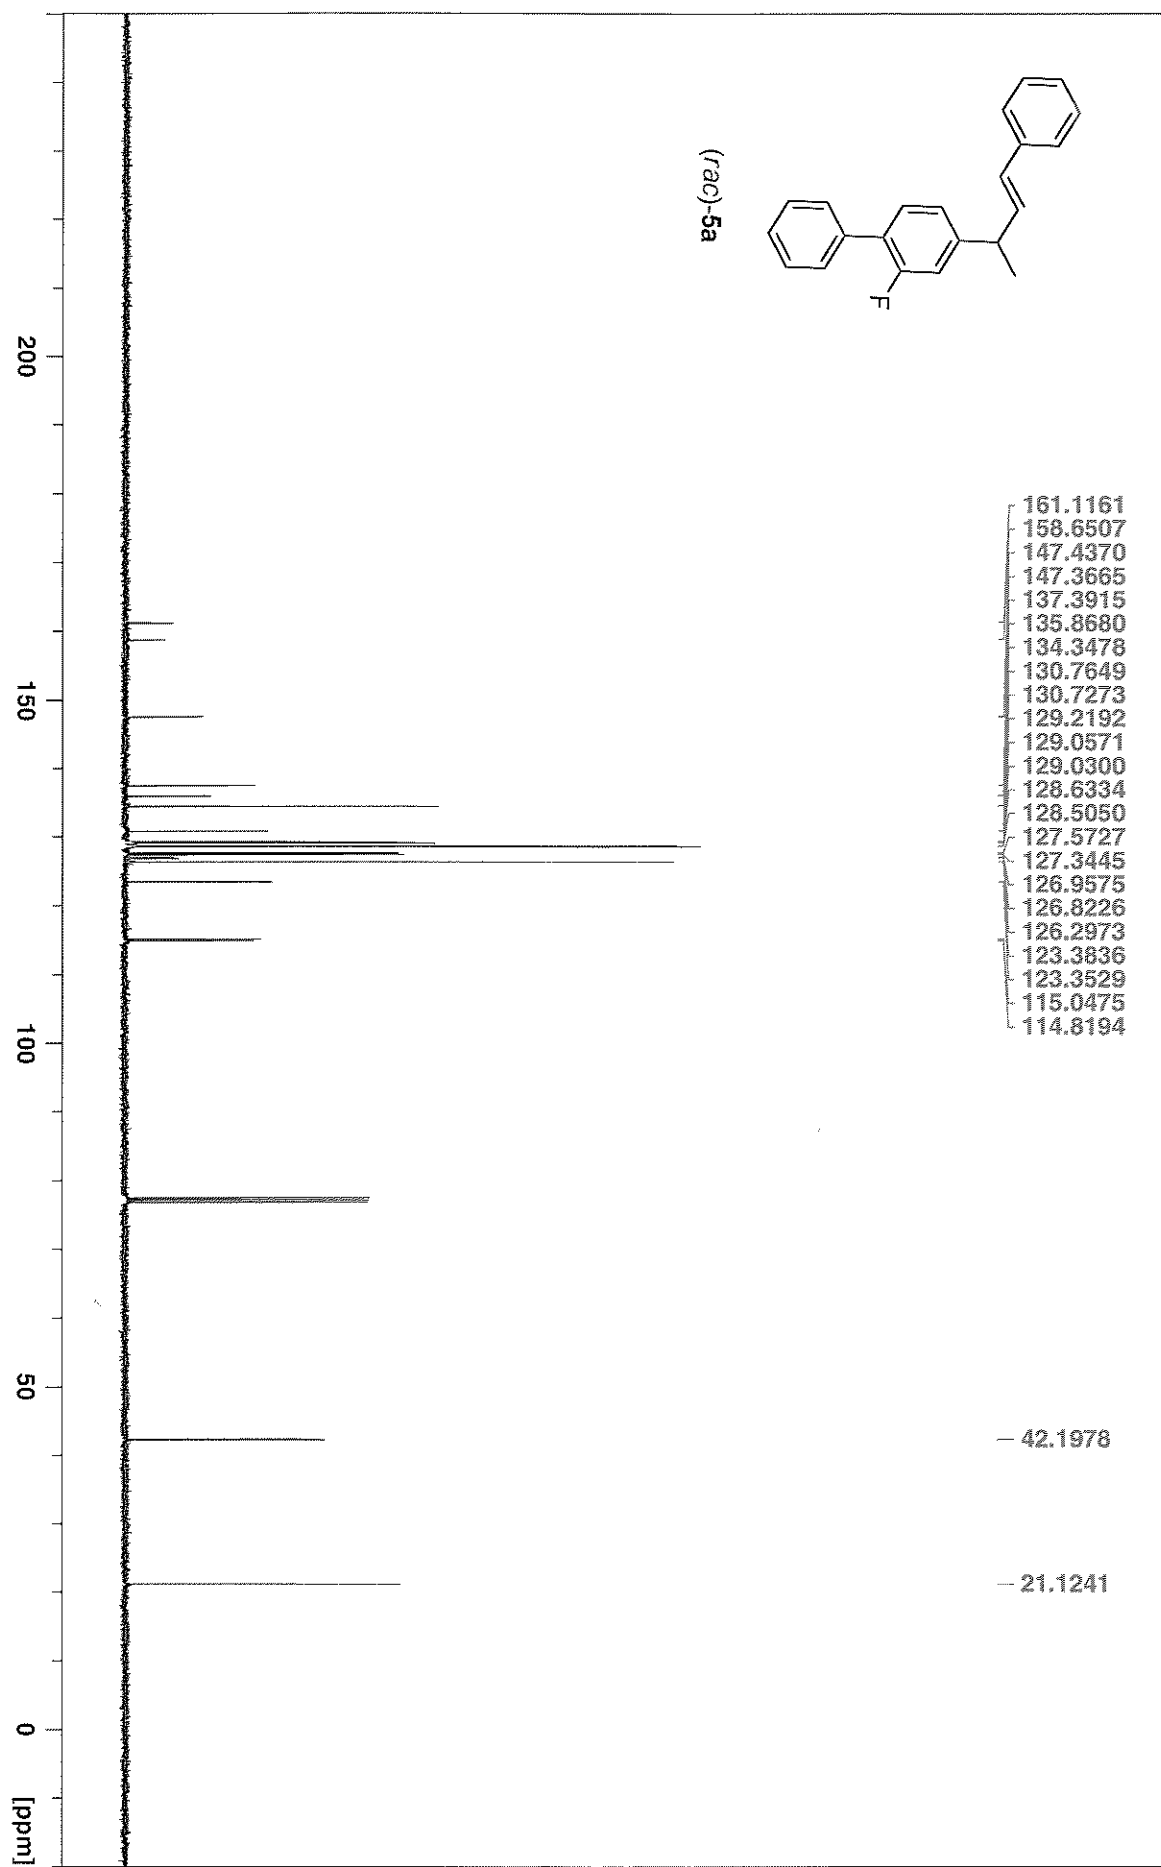

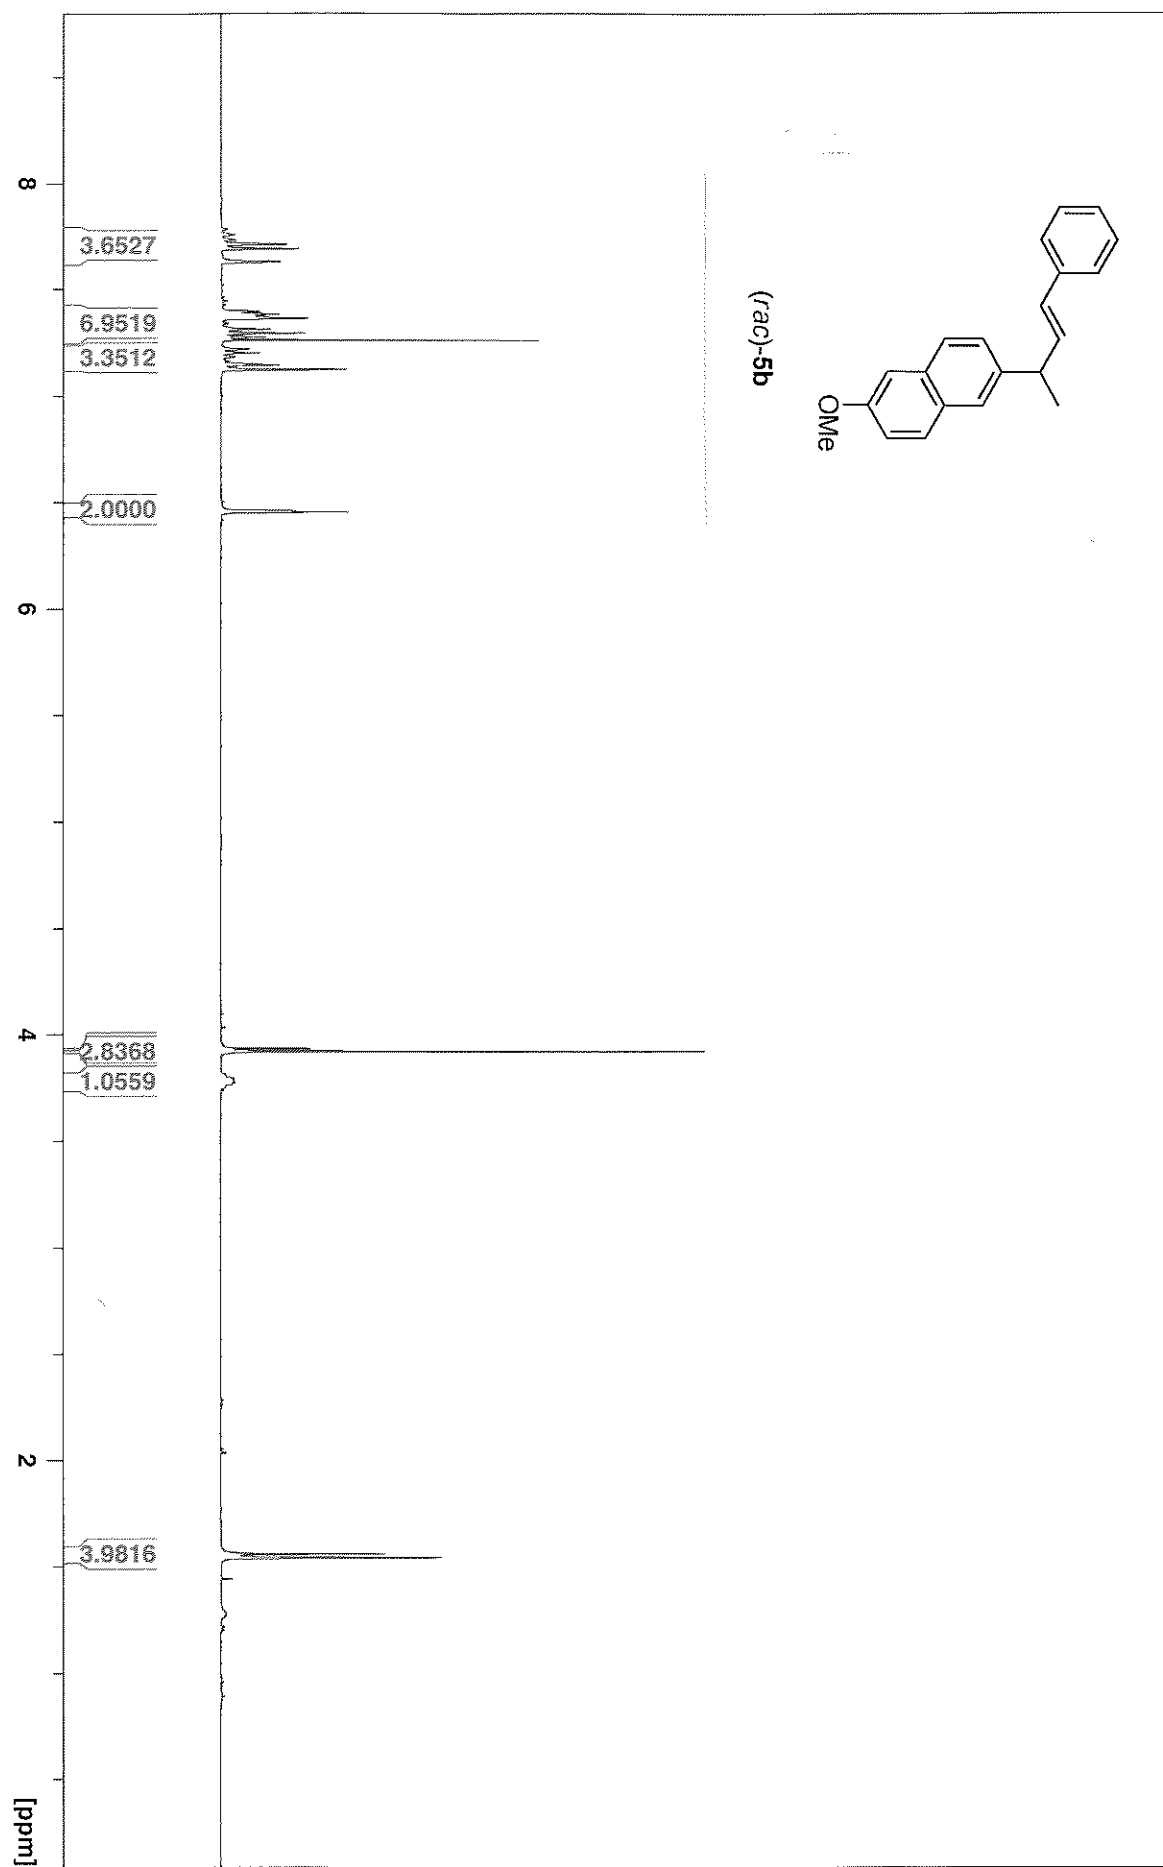

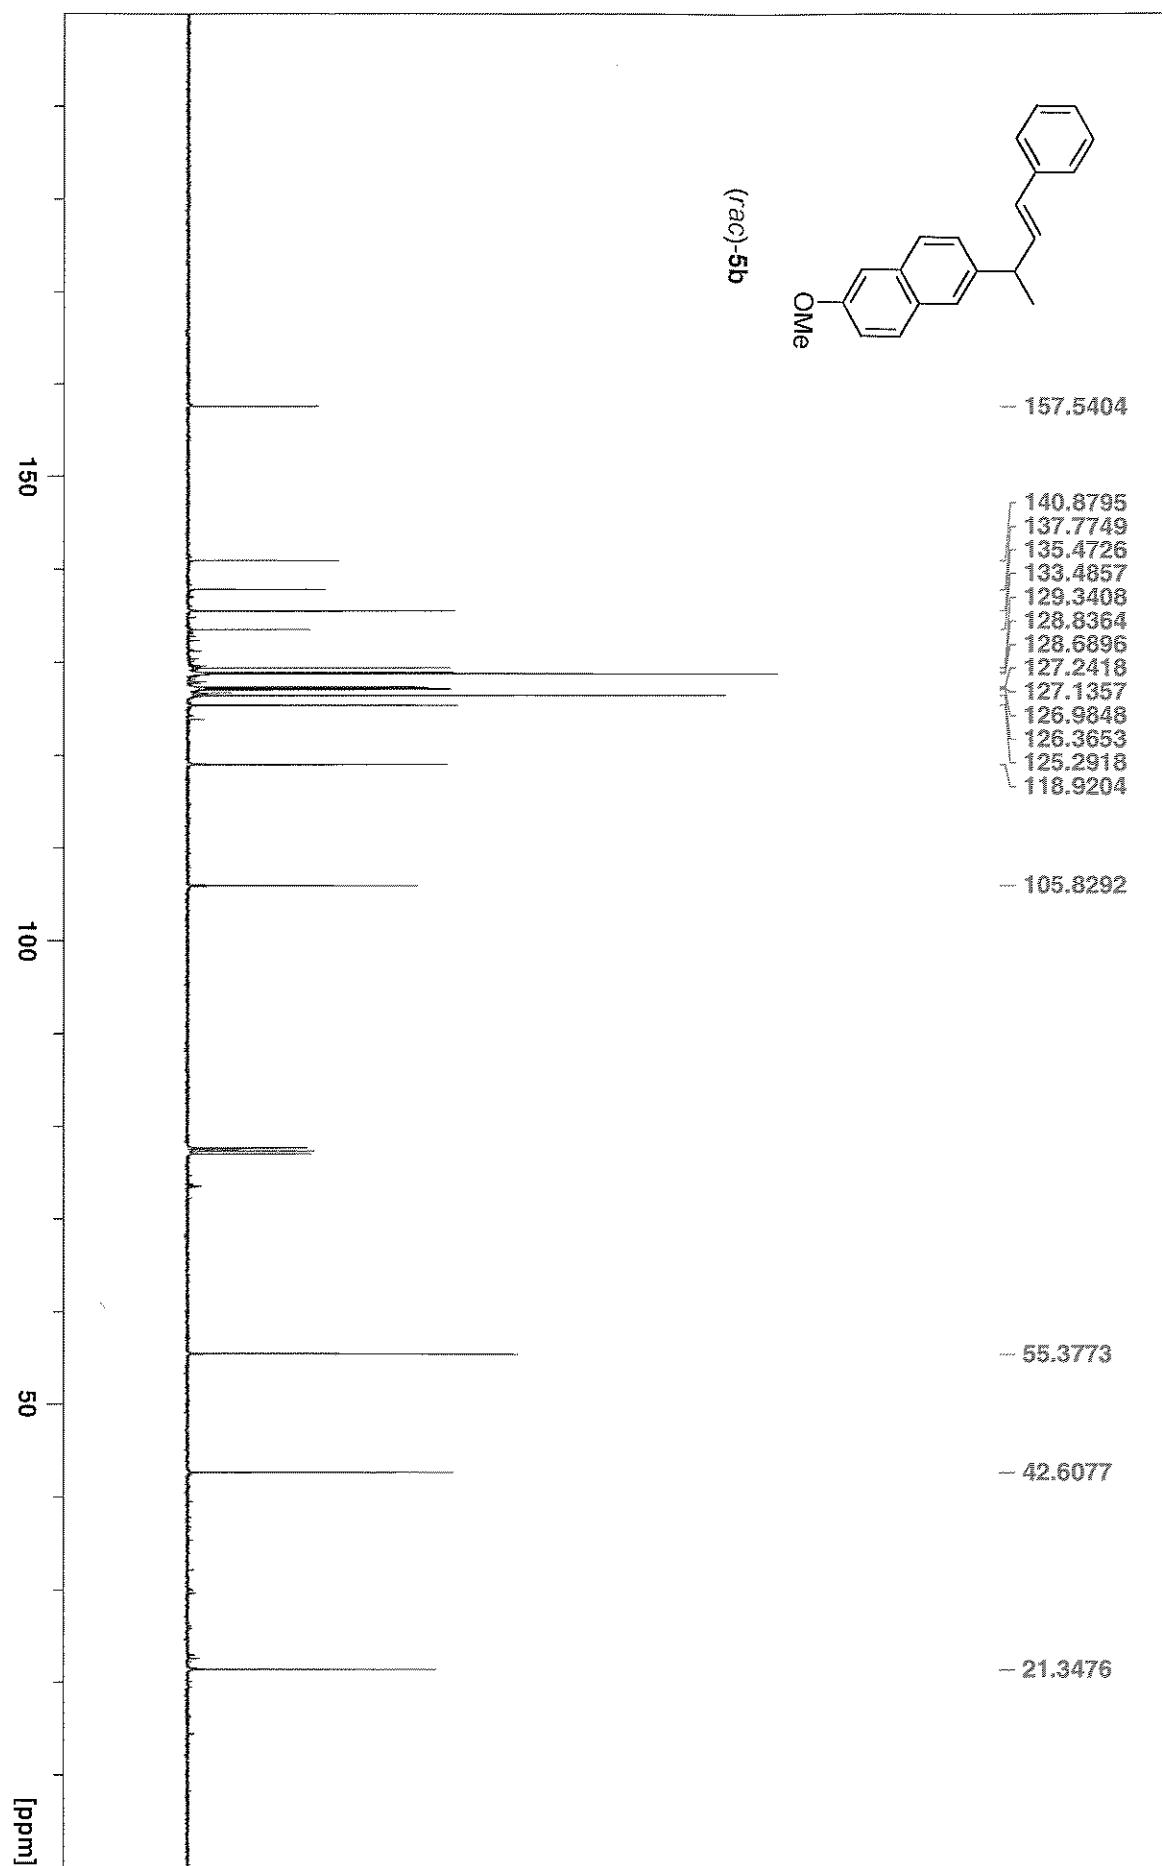

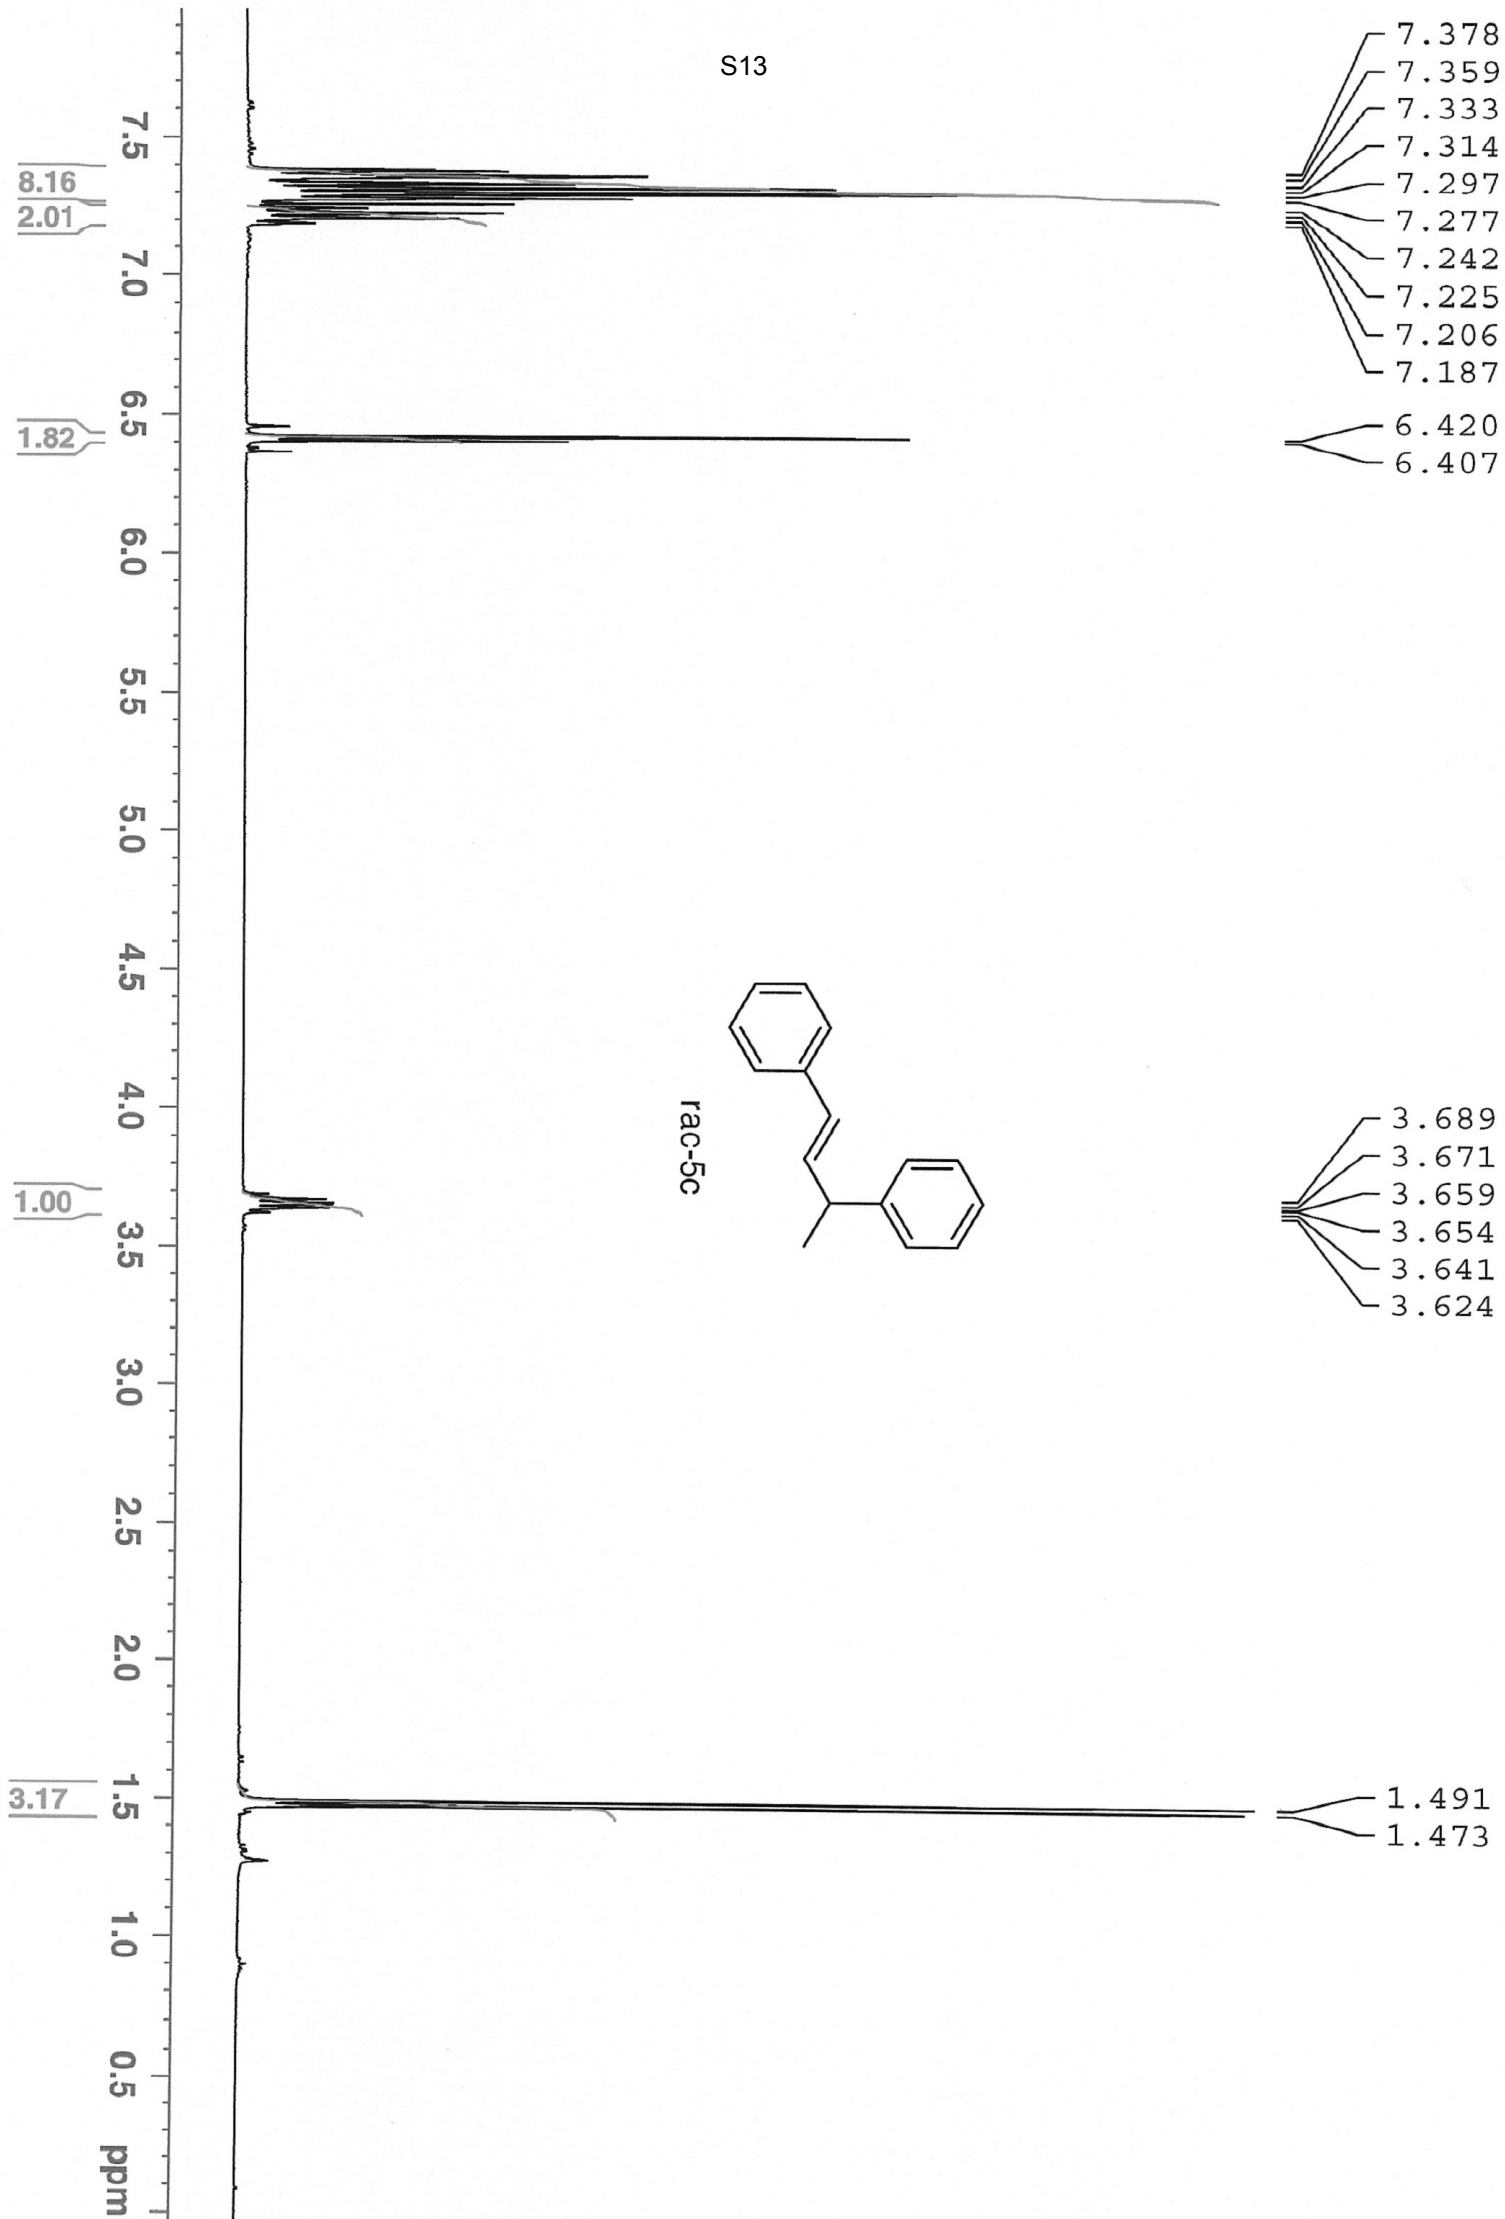

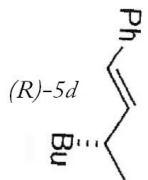

S14

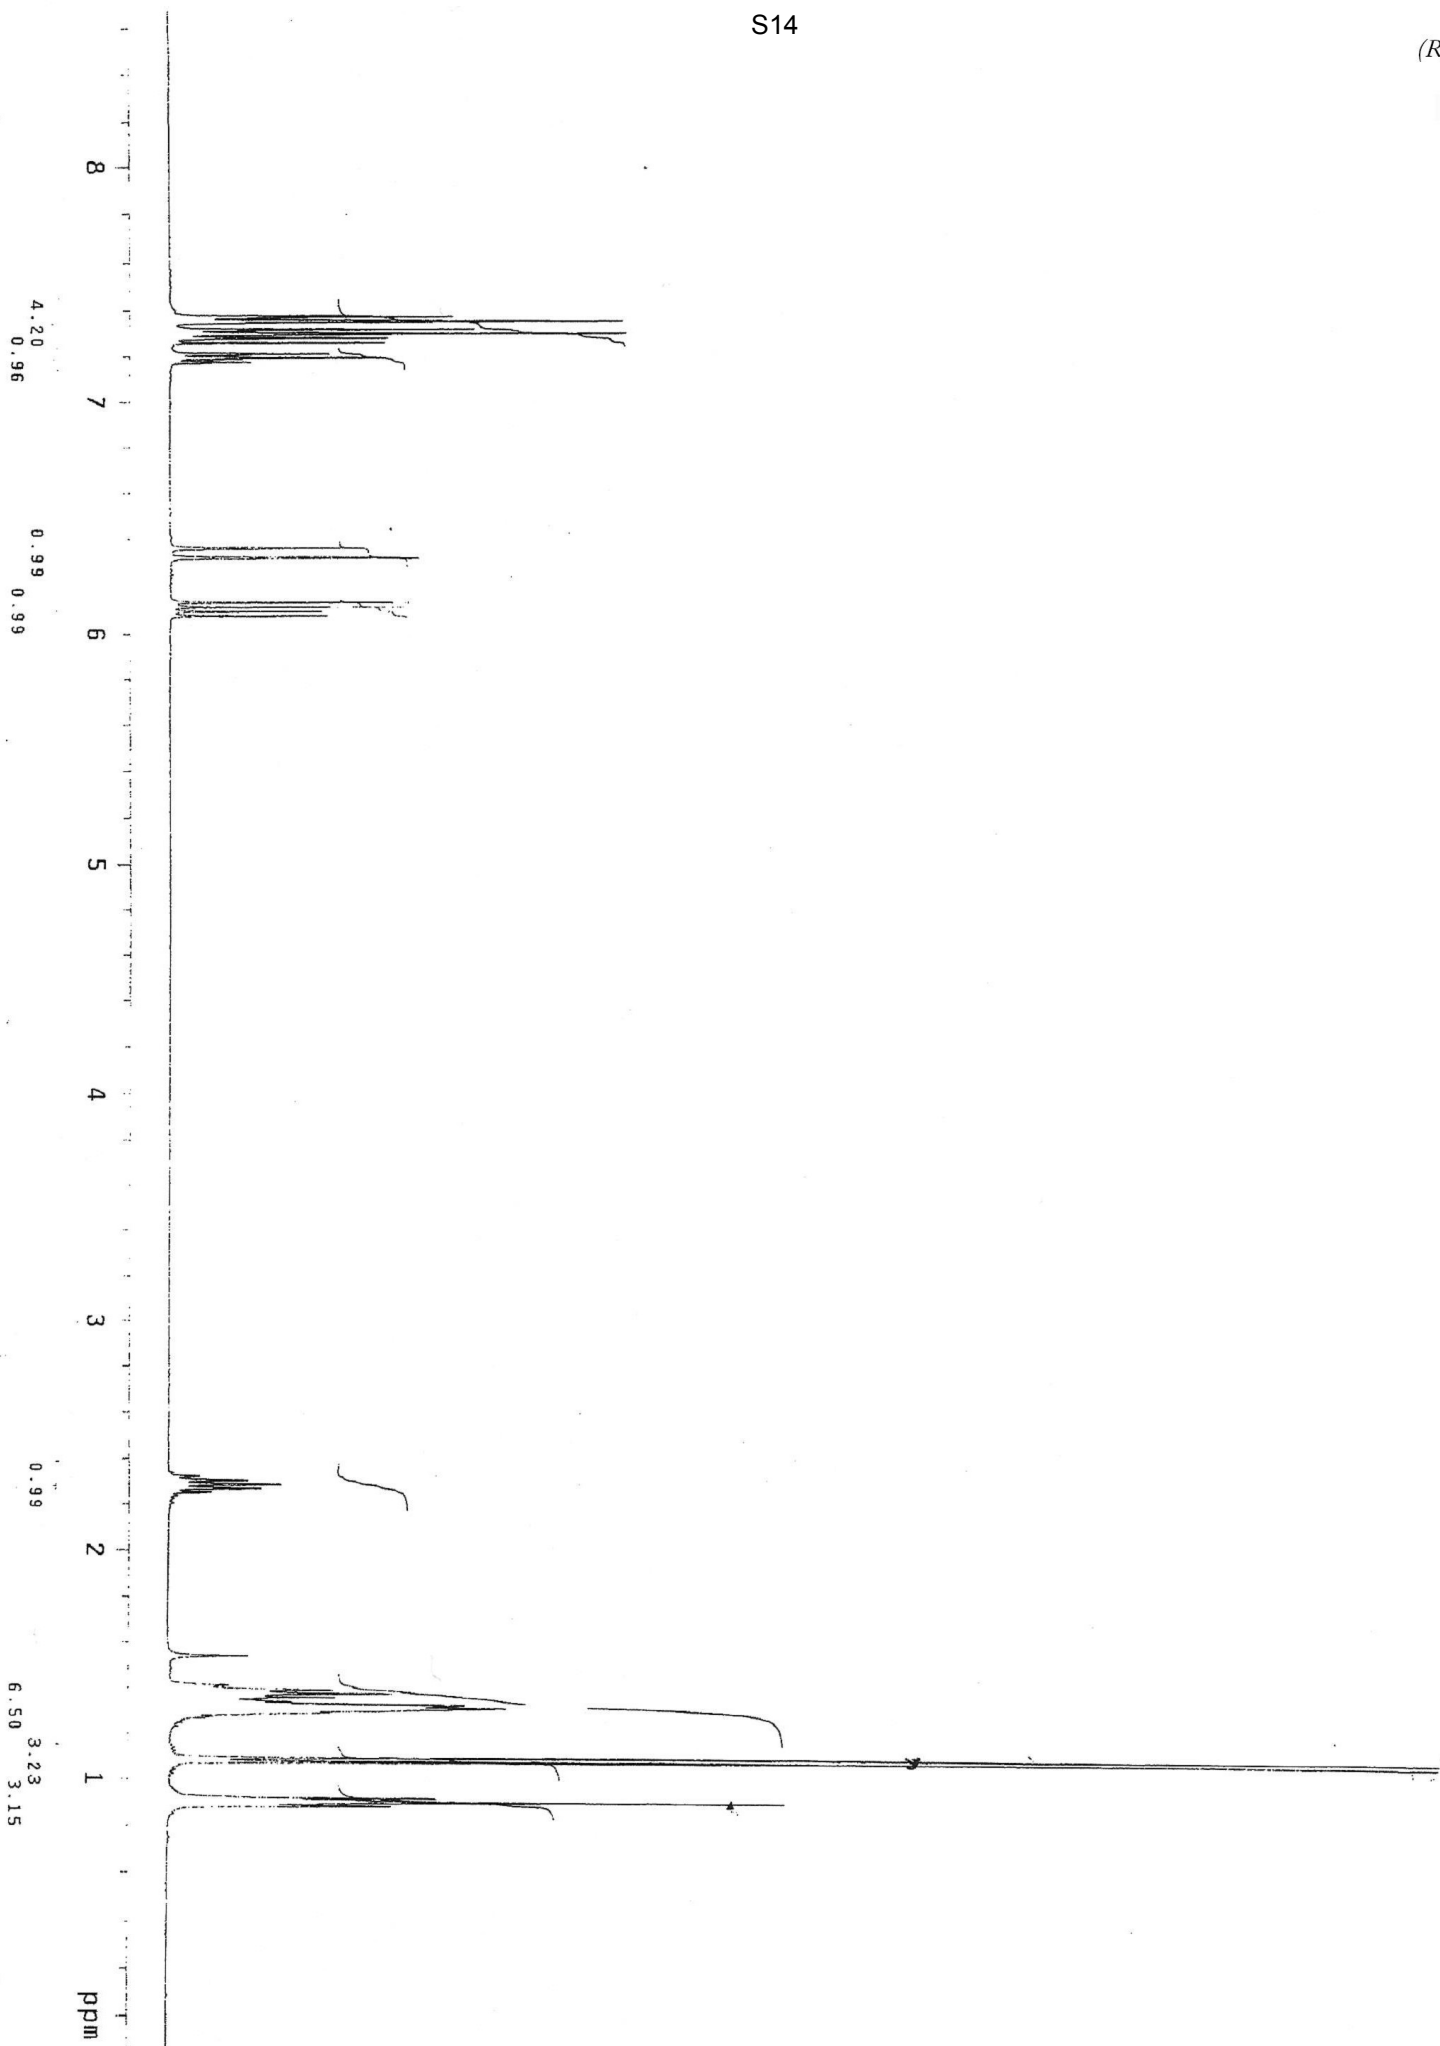

S15

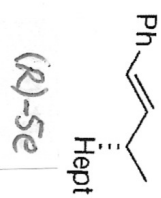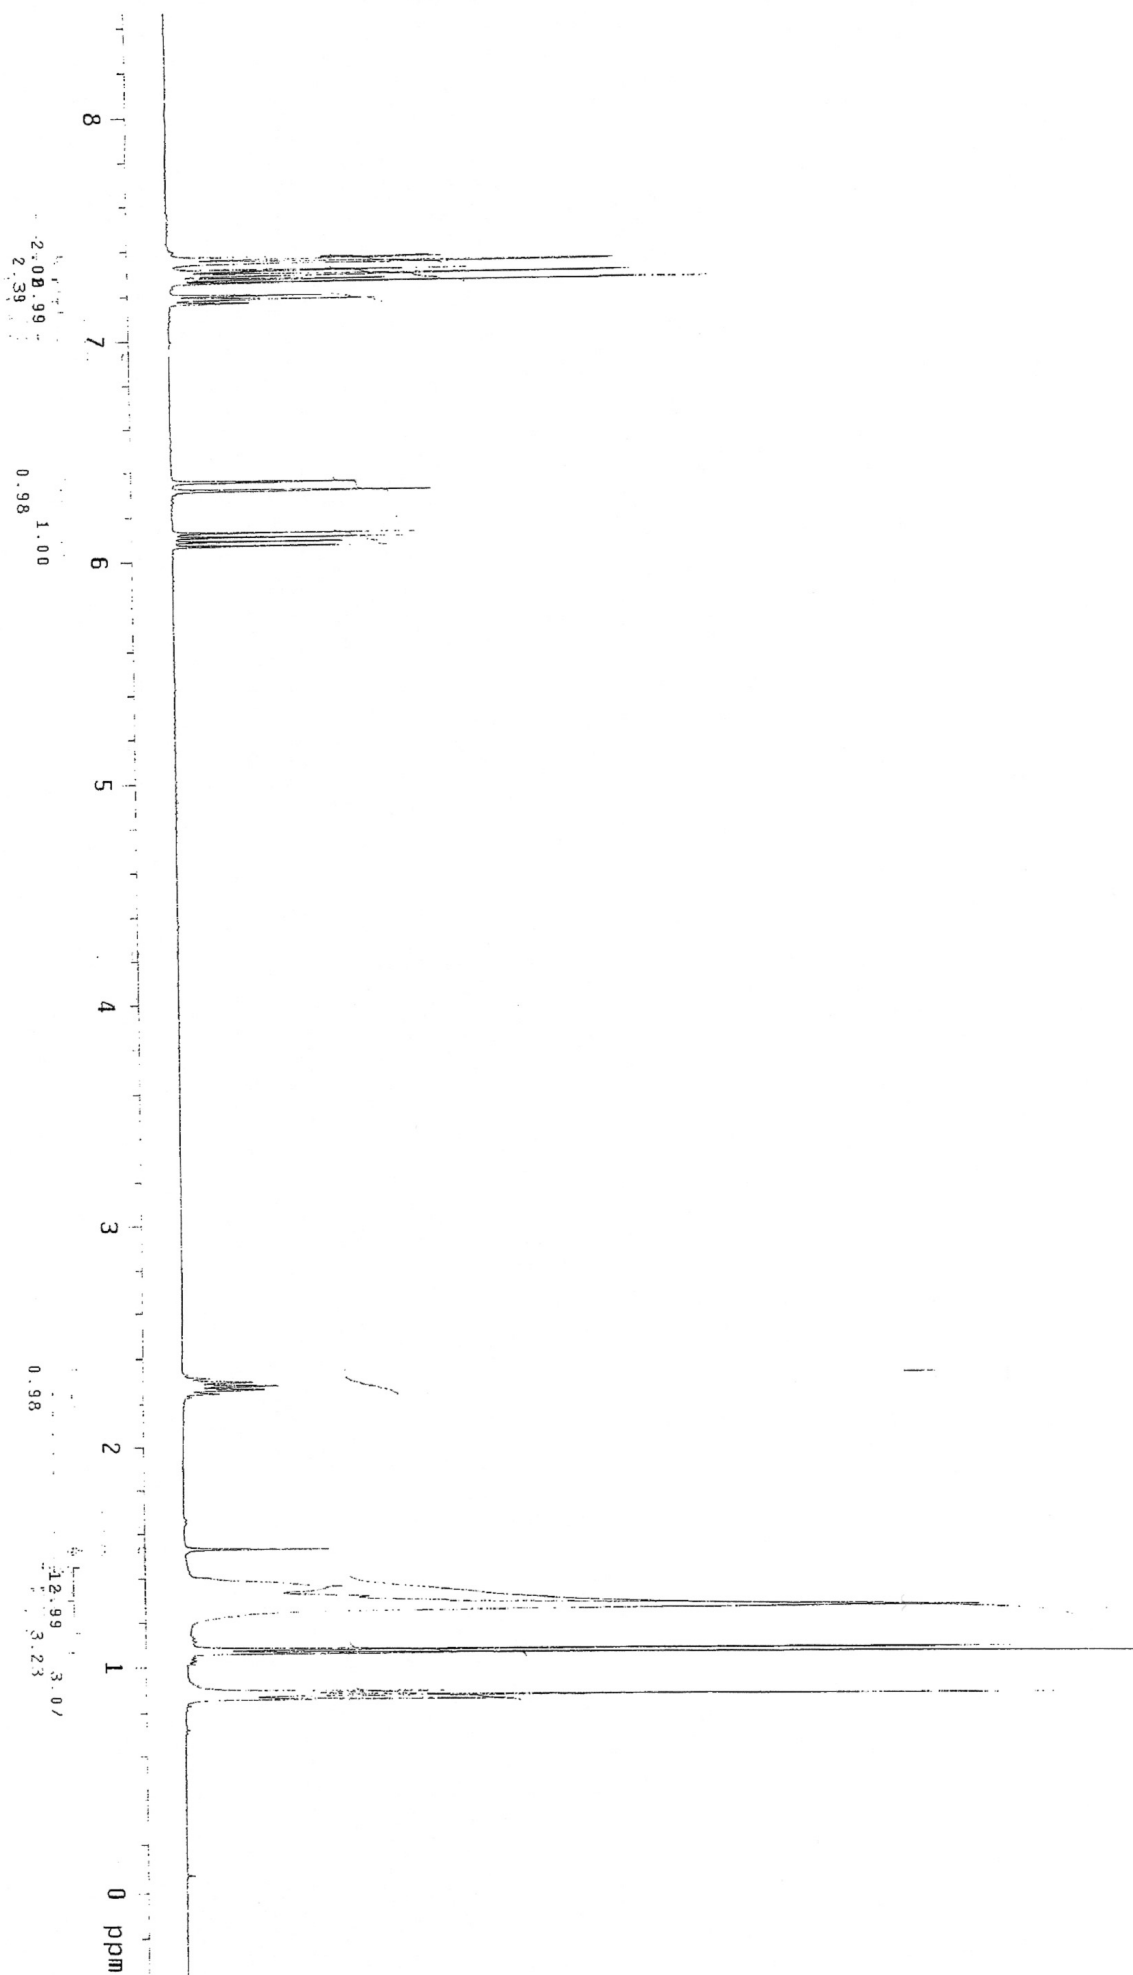

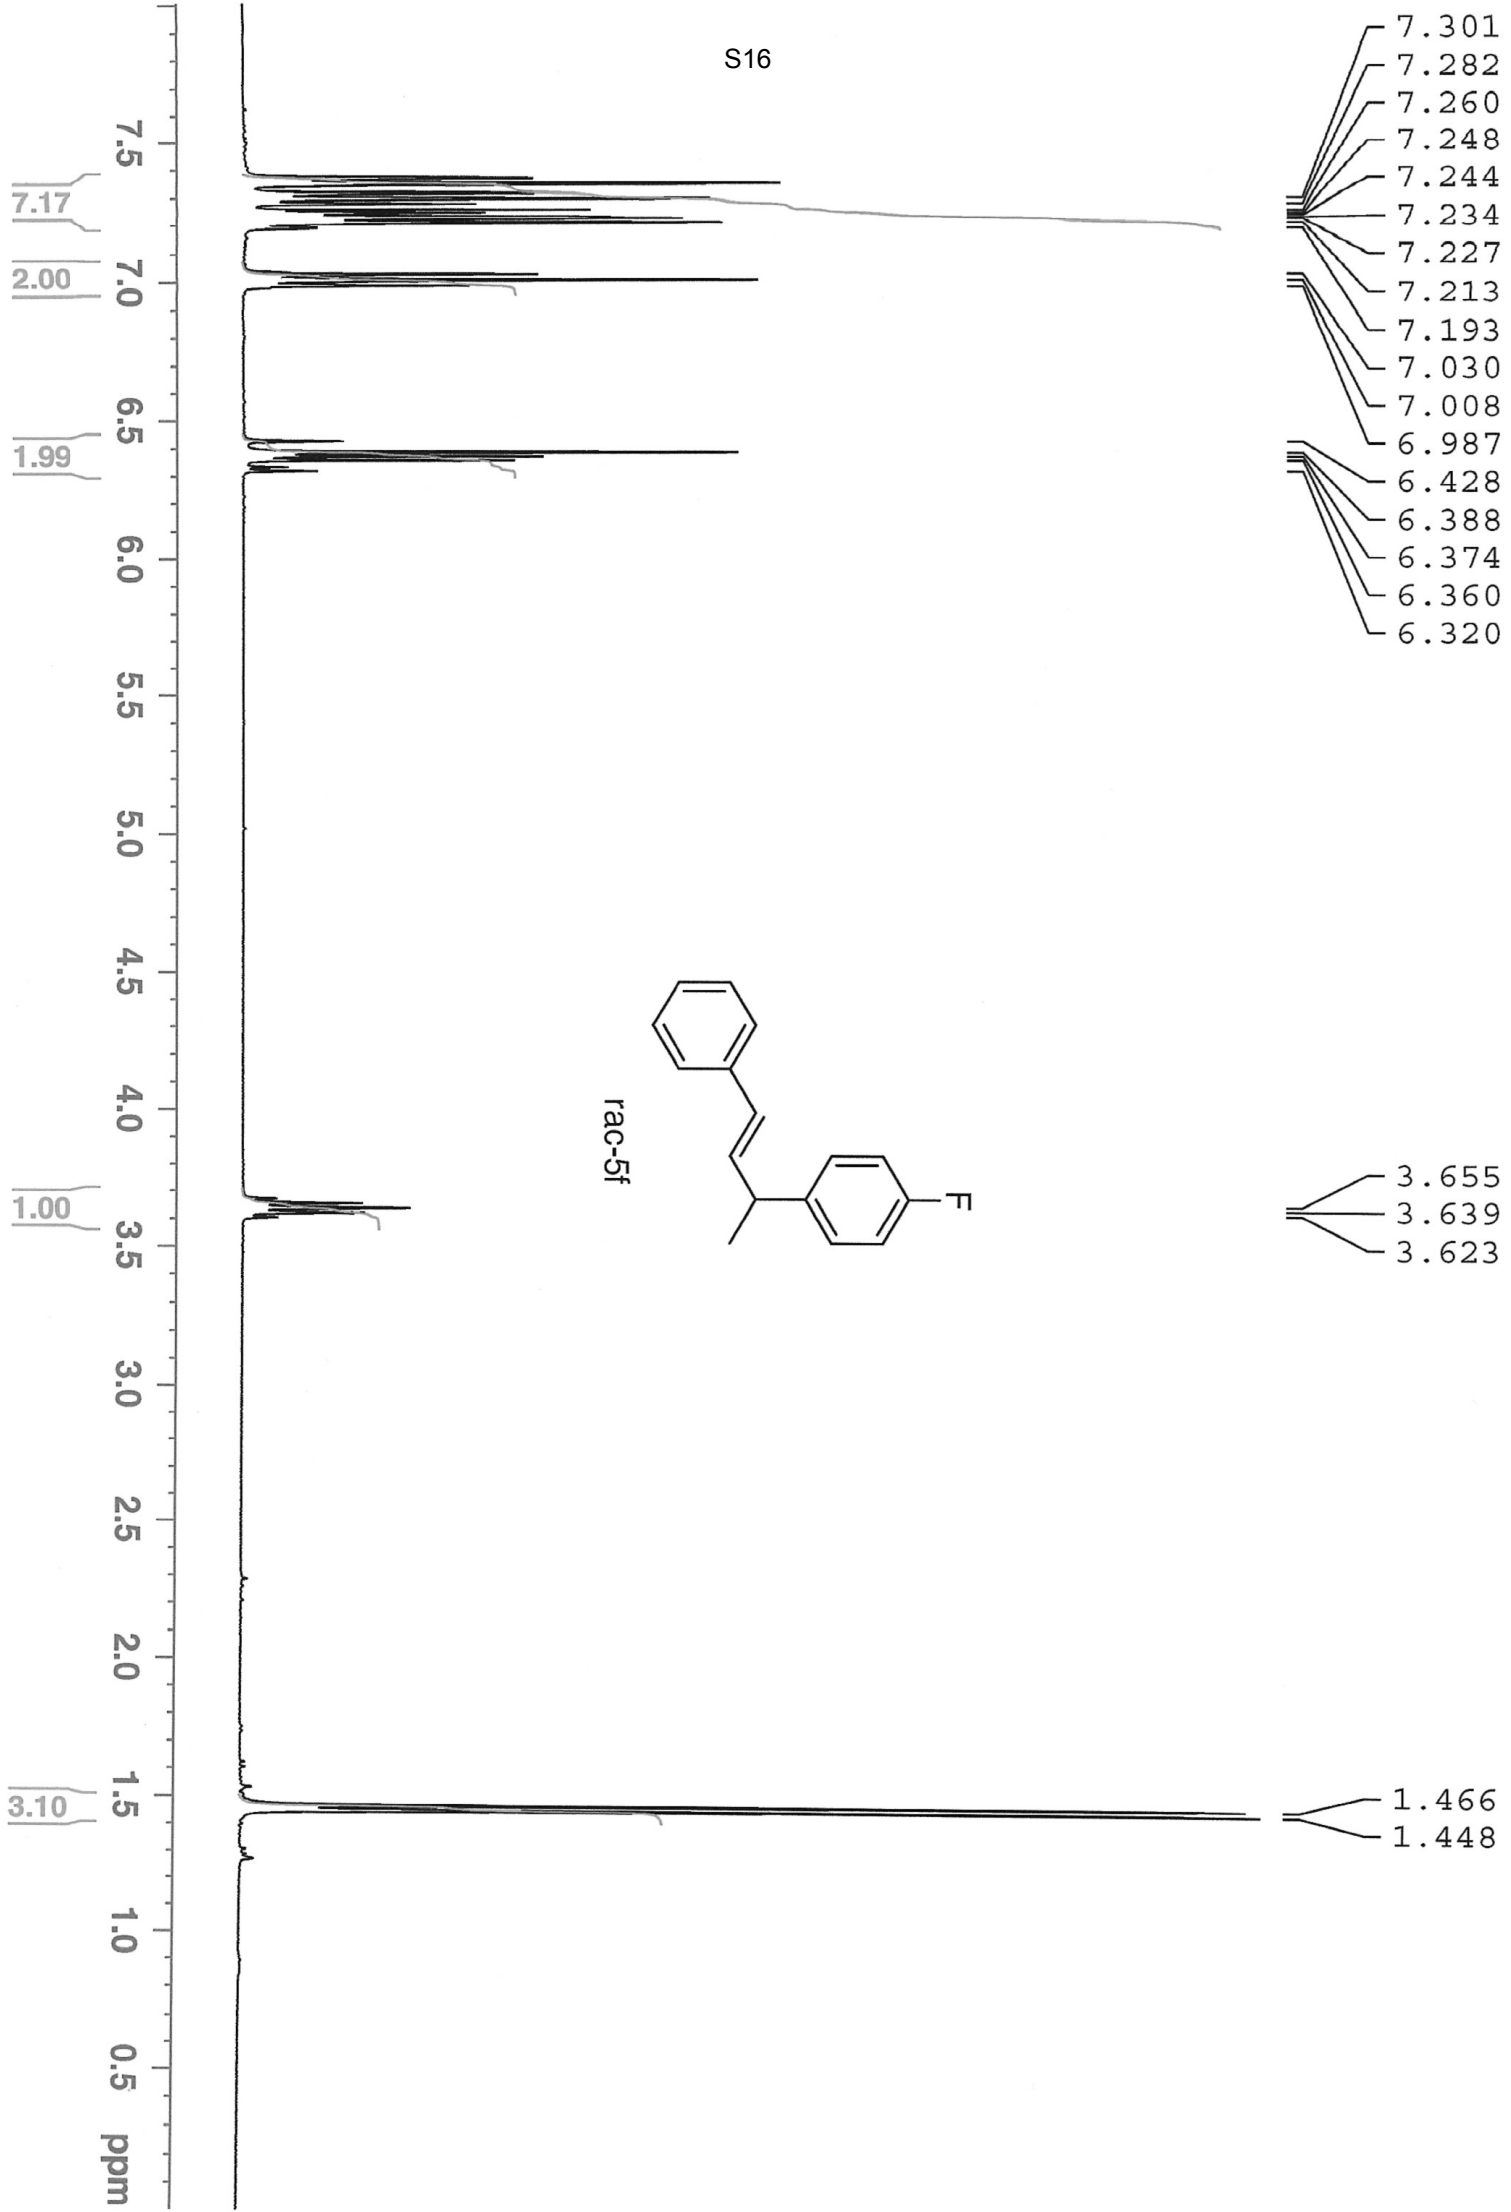





**(S)-7a**

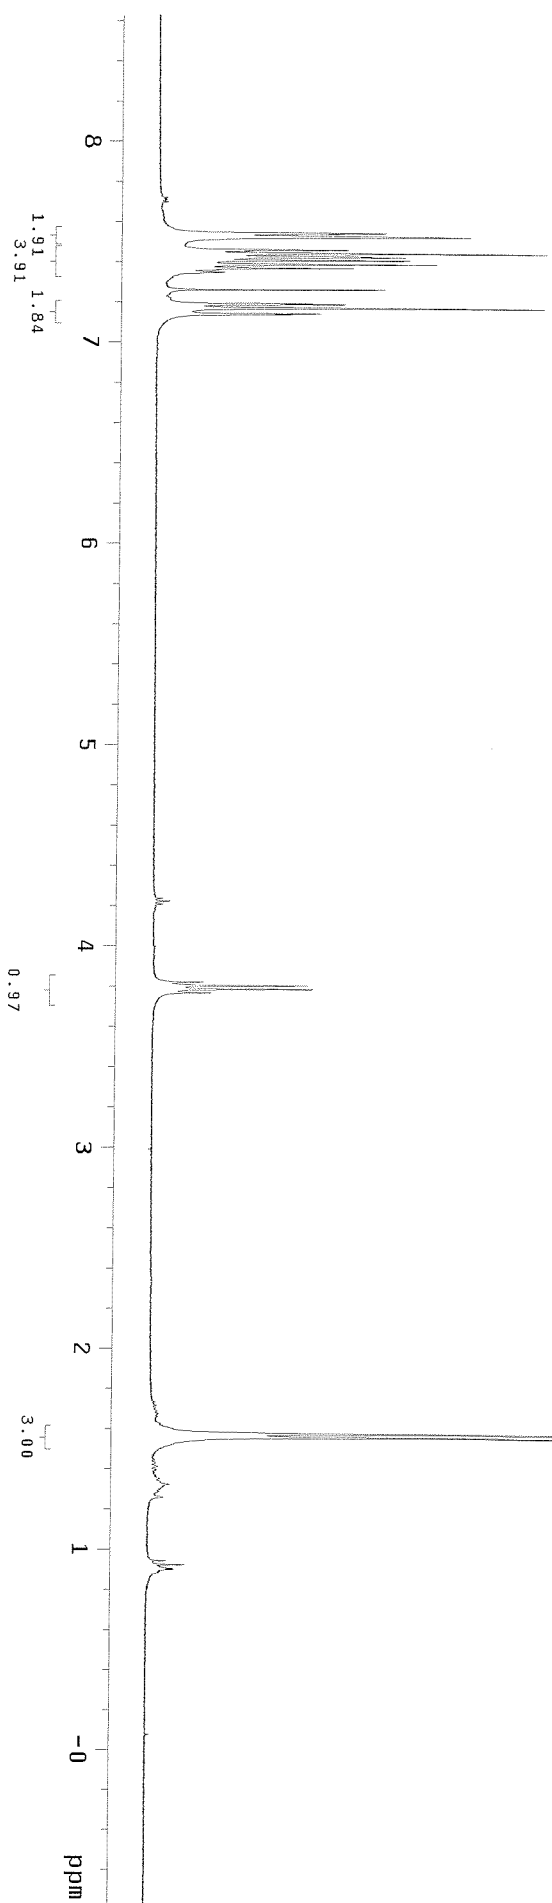

S18

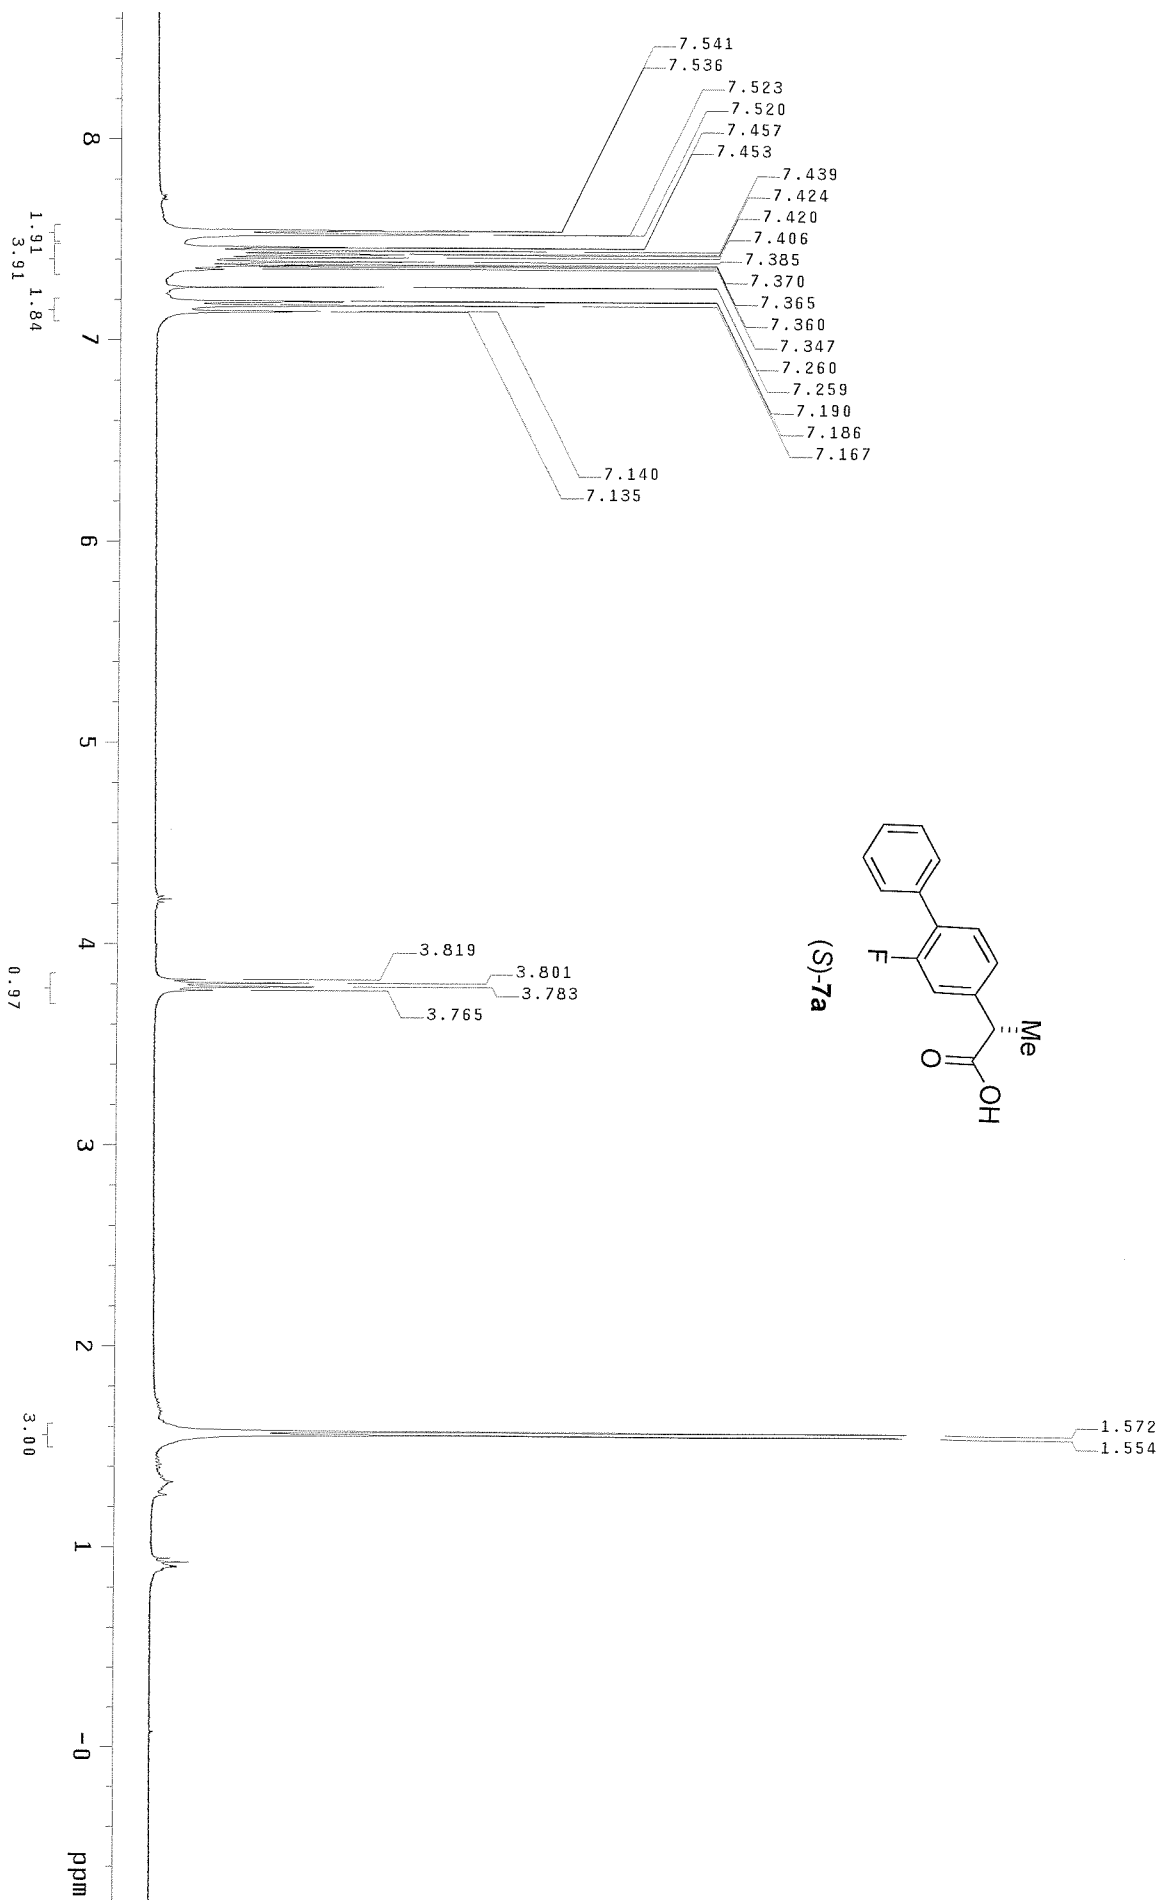

Reported by User: HPLC User (User)

Project Name: Lisa

## SAMPLE INFORMATION

|                   |                        |                     |                     |
|-------------------|------------------------|---------------------|---------------------|
| Sample Name:      | LMK-E-102-85-15-fl1-OJ | Acquired By:        | System              |
| Sample Type:      | Unknown                | Date Acquired:      | 2010-01-14 15:41:18 |
| Vial:             | 82                     | Acq. Method Set:    | 0_15_0_85_flow_1    |
| Injection #:      | 1                      | Date Processed:     | 2010-07-02 15:17:38 |
| Injection Volume: | 10,00 uI               | Processing Method:  | Default             |
| Run Time:         | 40,0 Minutes           | Channel Name:       | 211 nm              |
| Sample Set Name:  | 20100114_LMK_E_102_OJ  | Proc. Chnl. Descr.: | PDA 211,0 nm        |

## Auto-Scaled Chromatogram

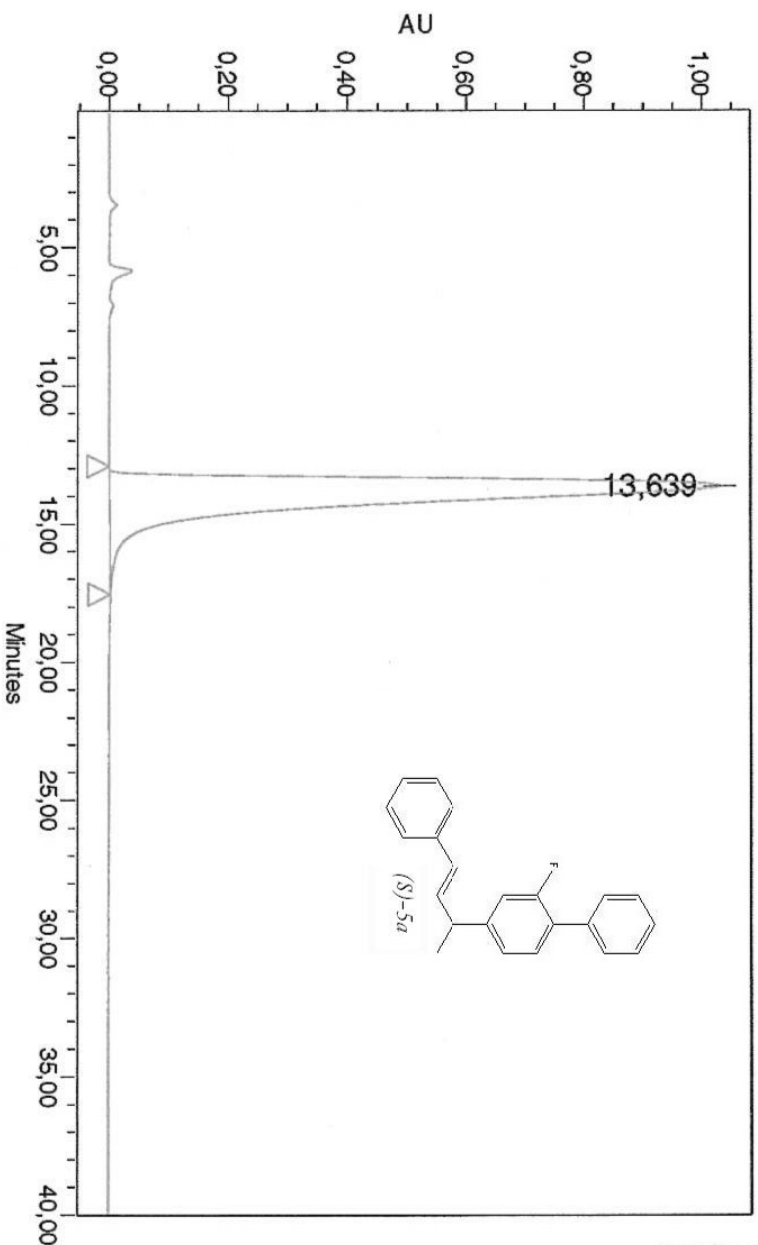

## Peak Results

|   | Name | RT     | Area     | Height  | Amount | Units |
|---|------|--------|----------|---------|--------|-------|
| 1 |      | 13,639 | 61594578 | 1029847 |        |       |

Reported by User: HPLC User (User)

Project Name: Lisa

## SAMPLE INFORMATION

|                   |                        |                     |                     |
|-------------------|------------------------|---------------------|---------------------|
| Sample Name:      | LMK-D-161              | Acquired By:        | System              |
| Sample Type:      | Unknown                | Date Acquired:      | 2009-06-17 14:02:02 |
| Vial:             | 71                     | Acq. Method Set:    | 0_15_0_85_flow_1    |
| Injection #:      | 1                      | Date Processed:     | 2010-07-02 15:48:13 |
| Injection Volume: | 10,00 uI               | Processing Method:  | Default             |
| Run Time:         | 50,0 Minutes           | Channel Name:       | 254 nm              |
| Sample Set Name:  | 200906172_LMK_D_161_OJ | Proc. Chnl. Descr.: | PDA 254,0 nm        |

## Auto-Scaled Chromatogram

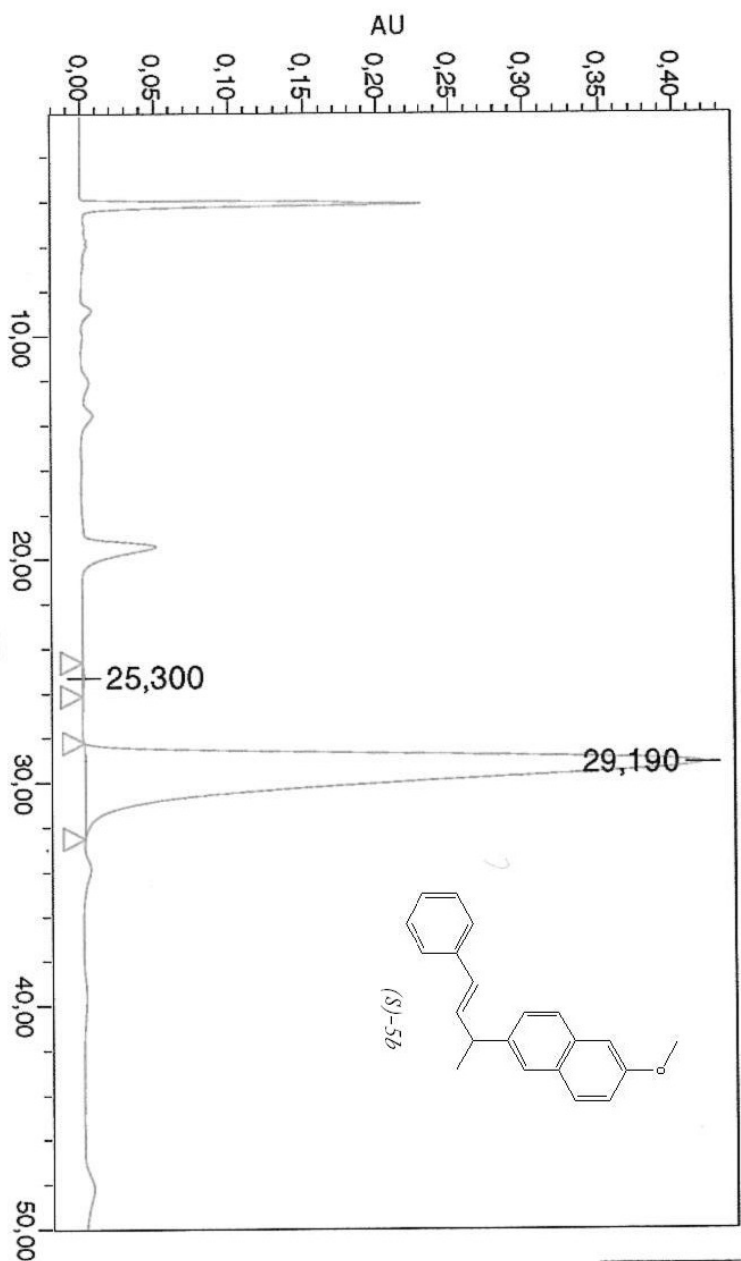

## Peak Results

| Name | RT     | Area     | Height | Amount | Units |
|------|--------|----------|--------|--------|-------|
| 1    | 25,300 | 43932    | 933    |        |       |
| 2    | 29,190 | 34989399 | 416440 |        |       |

Reported by User: HPLC User (User)

Project Name: Lisa

## SAMPLE INFORMATION

|                   |                          |                     |                     |
|-------------------|--------------------------|---------------------|---------------------|
| Sample Name:      | LMK-D-143_85_15_flow1_OJ | Acquired By:        | System              |
| Sample Type:      | Unknown                  | Date Acquired:      | 2009-05-28 15:58:20 |
| Vial:             | 59                       | Acq. Method Set:    | 0_15_0_85_flow_1    |
| Injection #:      | 1                        | Date Processed:     | 2010-07-02 15:52:56 |
| Injection Volume: | 10.00 uI                 | Processing Method:  | Default             |
| Run Time:         | 60.0 Minutes             | Channel Name:       | 211 nm              |
| Sample Set Name:  |                          | Proc. Chnl. Descr.: | PDA 254,0 nm        |

## Auto-Scaled Chromatogram

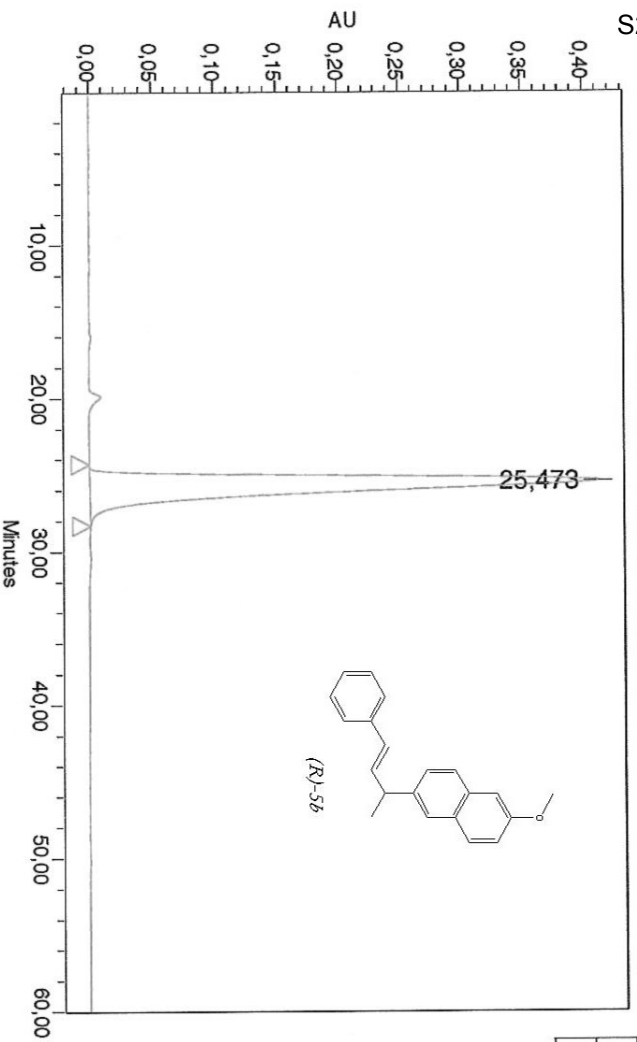

## Peak Results

| Name | RT     | Area     | Height | Amount | Units |
|------|--------|----------|--------|--------|-------|
| 1    | 25.473 | 28275219 | 411698 |        |       |

Reported by User: HPLC User (User)

Project Name: Lisa

## SAMPLE INFORMATION

|                   |                           |                     |                     |
|-------------------|---------------------------|---------------------|---------------------|
| Sample Name:      | LMK-E-154-crude           | Acquired By:        | User                |
| Sample Type:      | Unknown                   | Date Acquired:      | 2010-02-24 14:48:07 |
| Vial:             | 84                        | Acq. Method Set:    | 0_01_0_999          |
| Injection #:      | 1                         | Date Processed:     | 2010-07-02 16:27:30 |
| Injection Volume: | 10,00 ul                  | Processing Method:  | Default             |
| Run Time:         | 130,0 Minutes             | Channel Name:       | 254 nm              |
| Sample Set Name:  | 20100224_LMK_E_154_155_OJ | Proc. Chnl. Descr.: | PDA 254,0 nm        |

## Auto-Scaled Chromatogram

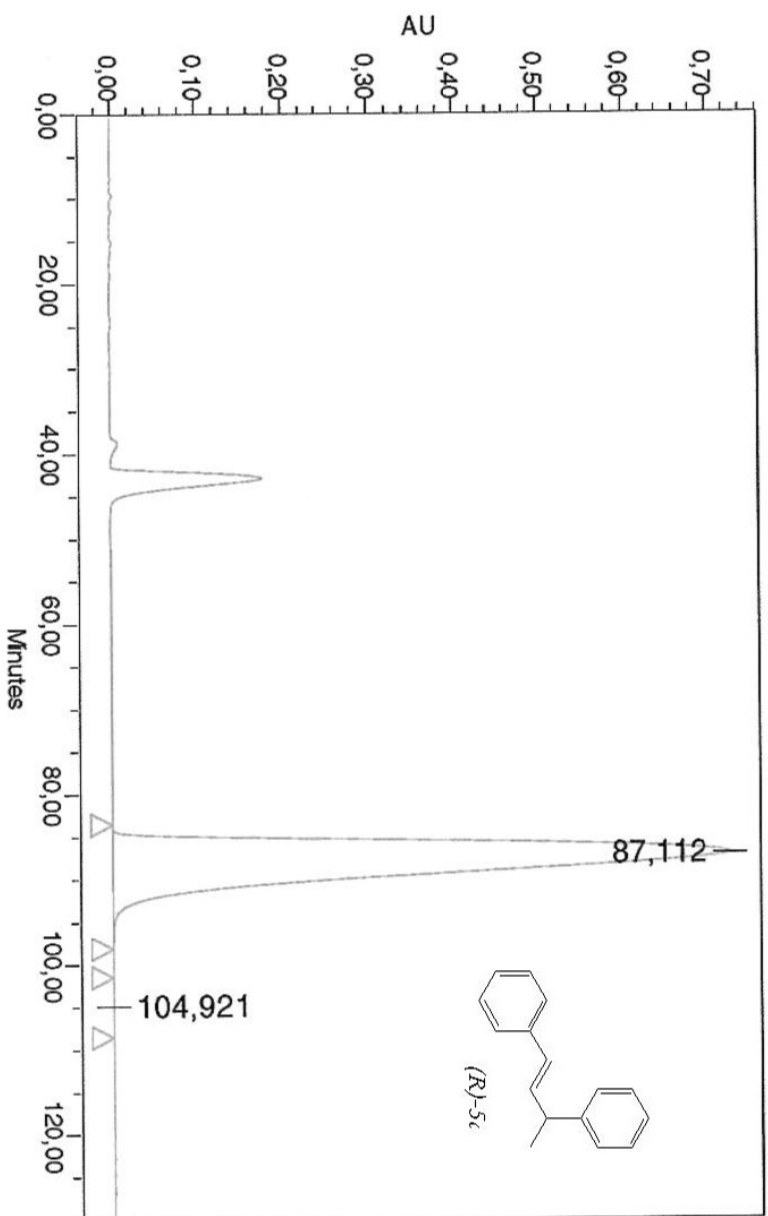

## Peak Results

| Name | RT      | Area      | Height | Amount | Units |
|------|---------|-----------|--------|--------|-------|
| 1    | 87,112  | 181068387 | 725736 |        |       |
| 2    | 104,921 | 16403     | 147    |        |       |

Reported by User: HPLC User (User)

Project Name: Lisa

## SAMPLE INFORMATION

Sample Name: LMK-D-101-S-PHF\_OJ\_01-999  
 Sample Type: Unknown  
 Vial: 9  
 Injection #: 1  
 Injection Volume: 10,00 µl  
 Run Time: 150,0 Minutes  
 Sample Set Name:  
 Acquired By: System  
 Date Acquired: 2009-03-26 04:29:46  
 Acq. Method Set: 0\_01\_0\_999  
 Date Processed: 2010-07-02 16:20:42  
 Processing Method: Default  
 Channel Name: 254 nm  
 Proc. Chnl. Descr.: PDA 254,0 nm

## Auto-Scaled Chromatogram

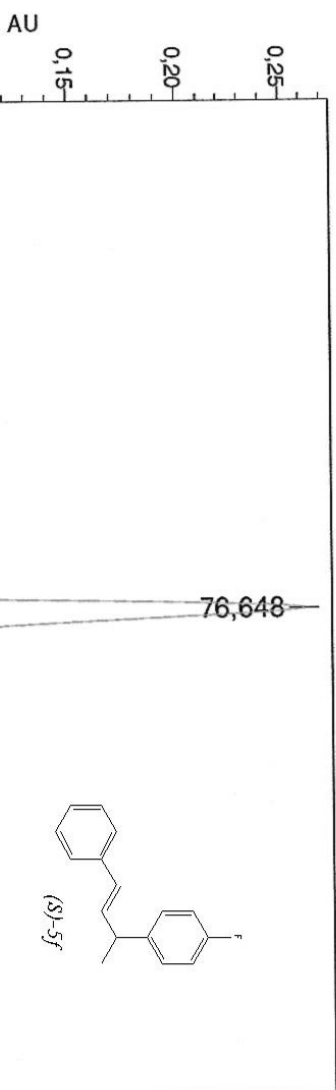

## Peak Results

| Name | RT     | Area     | Height | Amount | Units |
|------|--------|----------|--------|--------|-------|
| 1    | 76,648 | 61169669 | 260482 |        |       |
| 2    | 92,950 | 106959   | 650    |        |       |

Reported by User: HPLC User (User)

Project Name: Lisa

## SAMPLE INFORMATION

|                   |                         |                     |                     |
|-------------------|-------------------------|---------------------|---------------------|
| Sample Name:      | LMK-D-96-R-Ph_OJ_01-999 | Acquired By:        | System              |
| Sample Type:      | Unknown                 | Date Acquired:      | 2009-03-25 21:57:22 |
| Vial:             | 6                       | Acq. Method Set:    | 0_01_0_999          |
| Injection #:      | 1                       | Date Processed:     | 2010-07-05 15:25:58 |
| Injection Volume: | 10,00 uL                | Processing Method:  | Default             |
| Run Time:         | 150,0 Minutes           | Channel Name:       | 254 nm              |
| Sample Set Name:  |                         | Proc. Chnl. Descr.: | PDA 254,0 nm        |

## Auto-Scaled Chromatogram

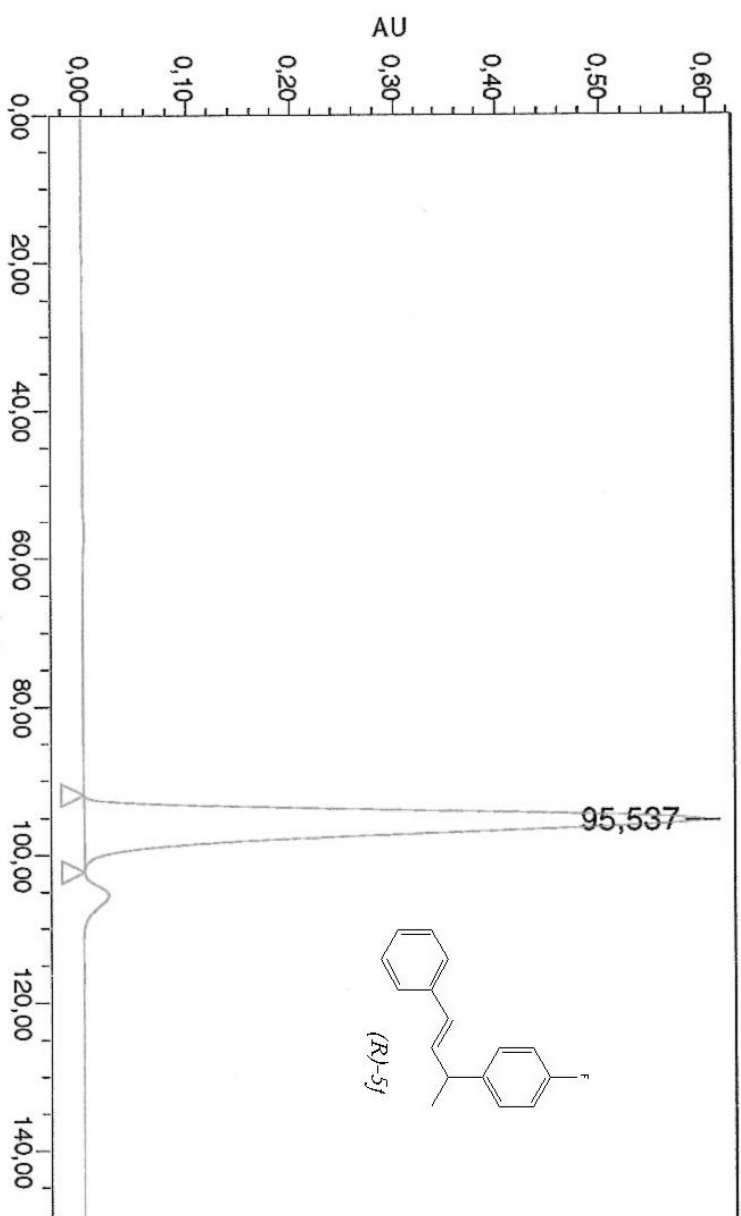

## Peak Results

| Name | RT     | Area      | Height | Amount | Units |
|------|--------|-----------|--------|--------|-------|
| 1    | 95,537 | 125718292 | 593596 |        |       |



Title :  
 Run File : c:\star\old colleagues\lisa\lab book e\lmk-e-104-r-florbi.run  
 Method File : c:\star\lisa\lab book e\lmk-e-104-r-florbi-middle.mth  
 Sample ID : LMK-E-104-R-Florbi

Injection Date: 2/15/2010 4:06 PM Calculation Date: 2/15/2010 5:30 PM

Operator : tony Detector Type: 3800 (10 Volts)  
 Workstation: ACER Bus Address : 44  
 Instrument : Varian Star #1 Sample Rate : 10.00 Hz  
 Channel : Middle = FID Run Time : 64.935 min

\*\* GC Workstation Multi Instrument Version 6.41 \*\* 00195-2088-D6B-20A1 \*\*

Chart Speed = 0.30 cm/min Attenuation = 7 Zero Offset = 3%  
 Start Time = 0.000 min End Time = 64.935 min Min / Tick = 1.00

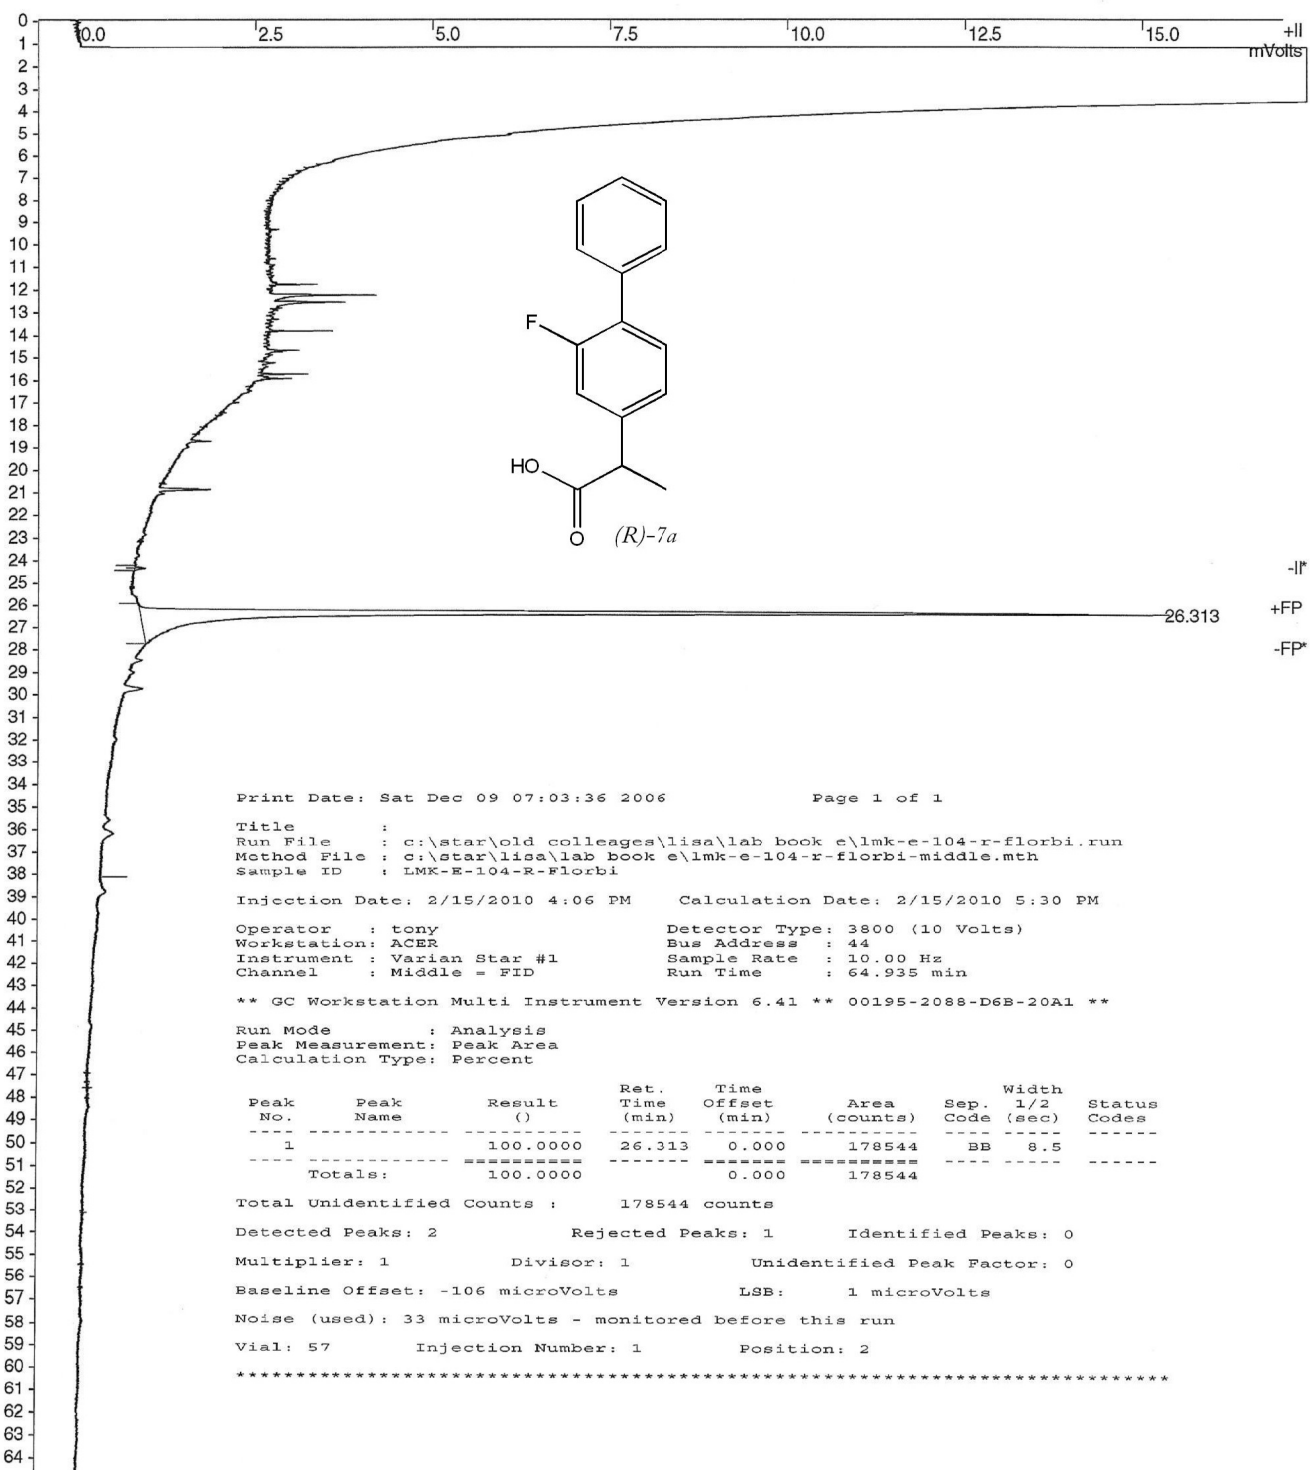

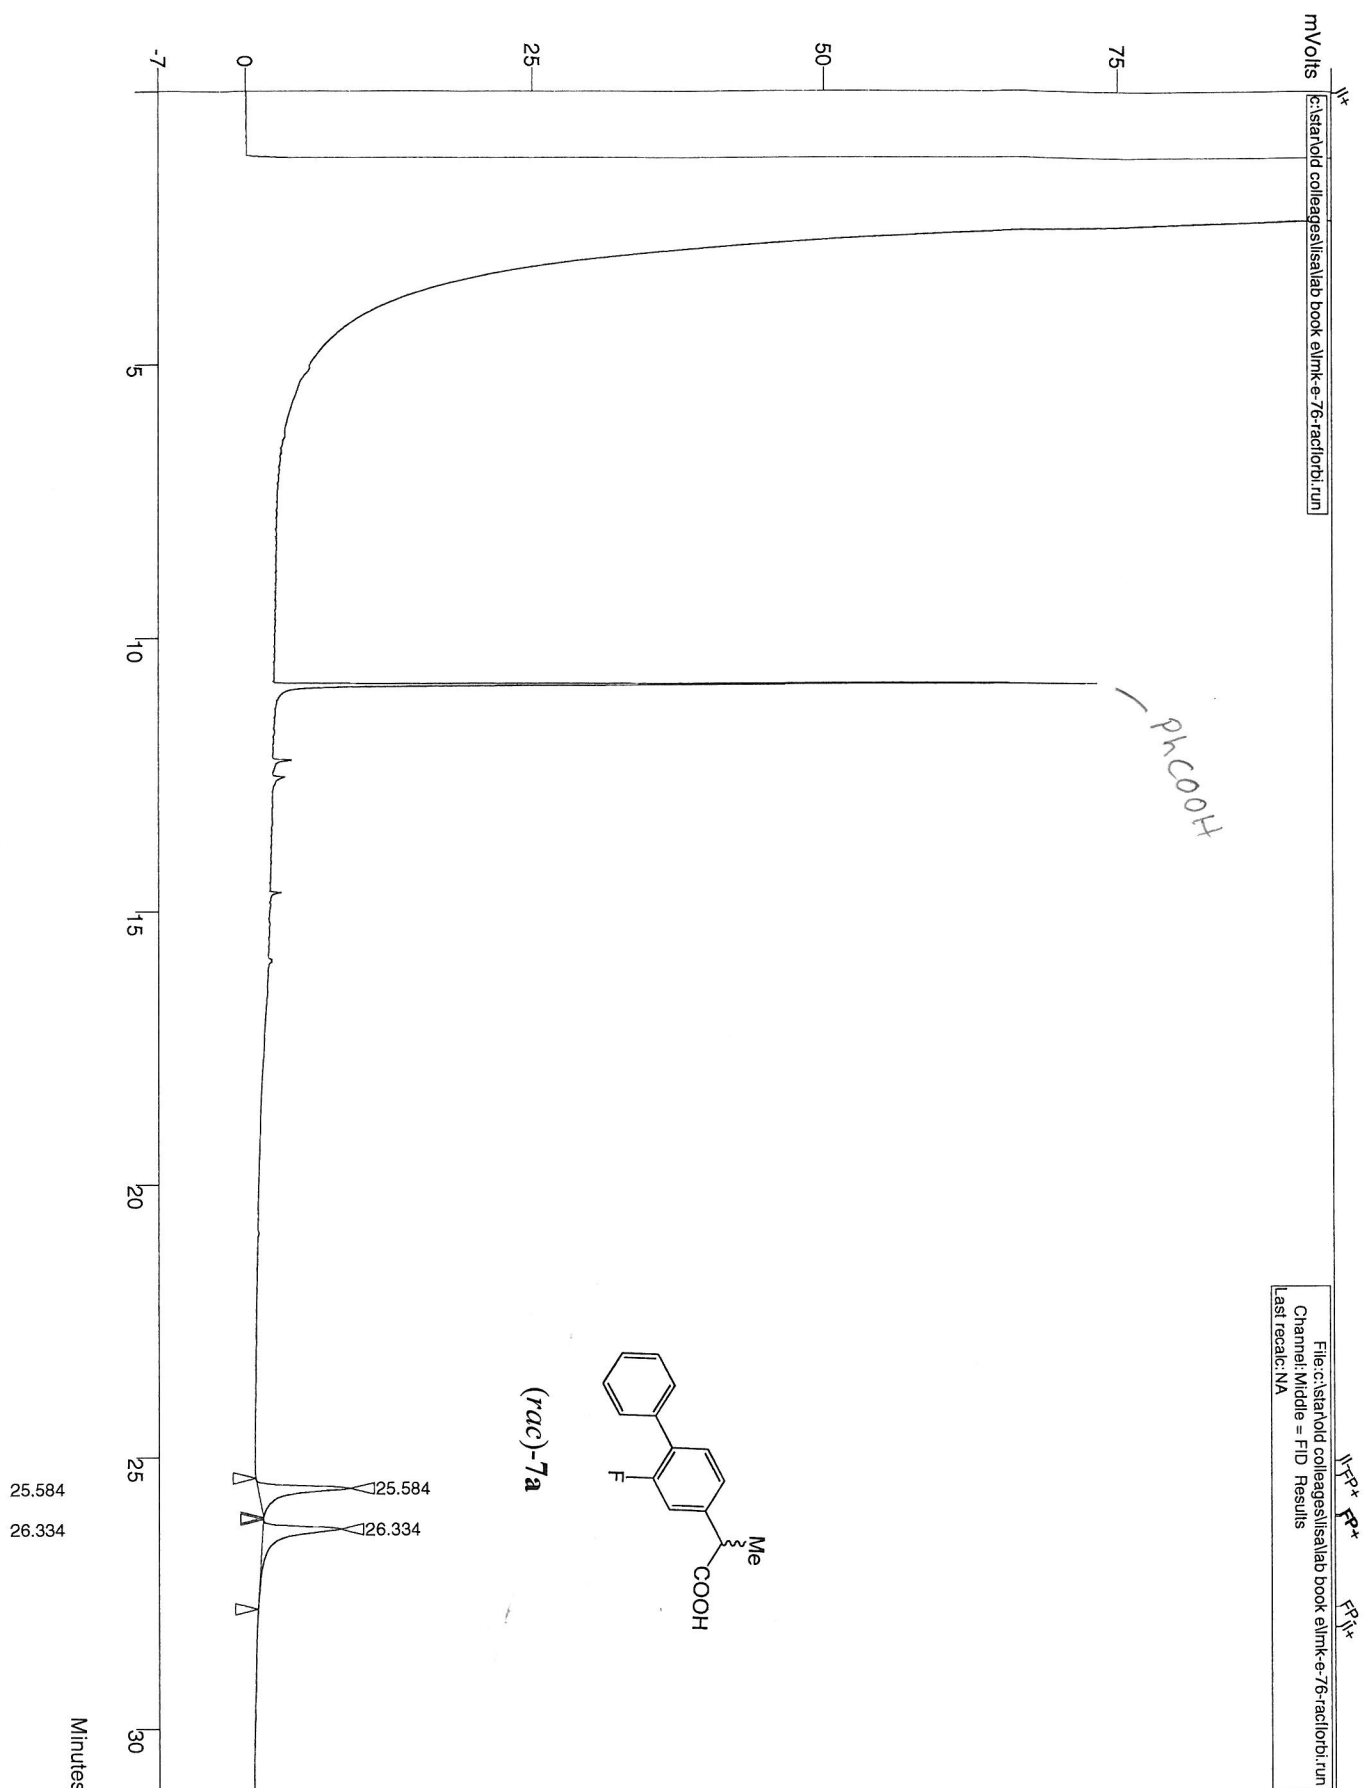

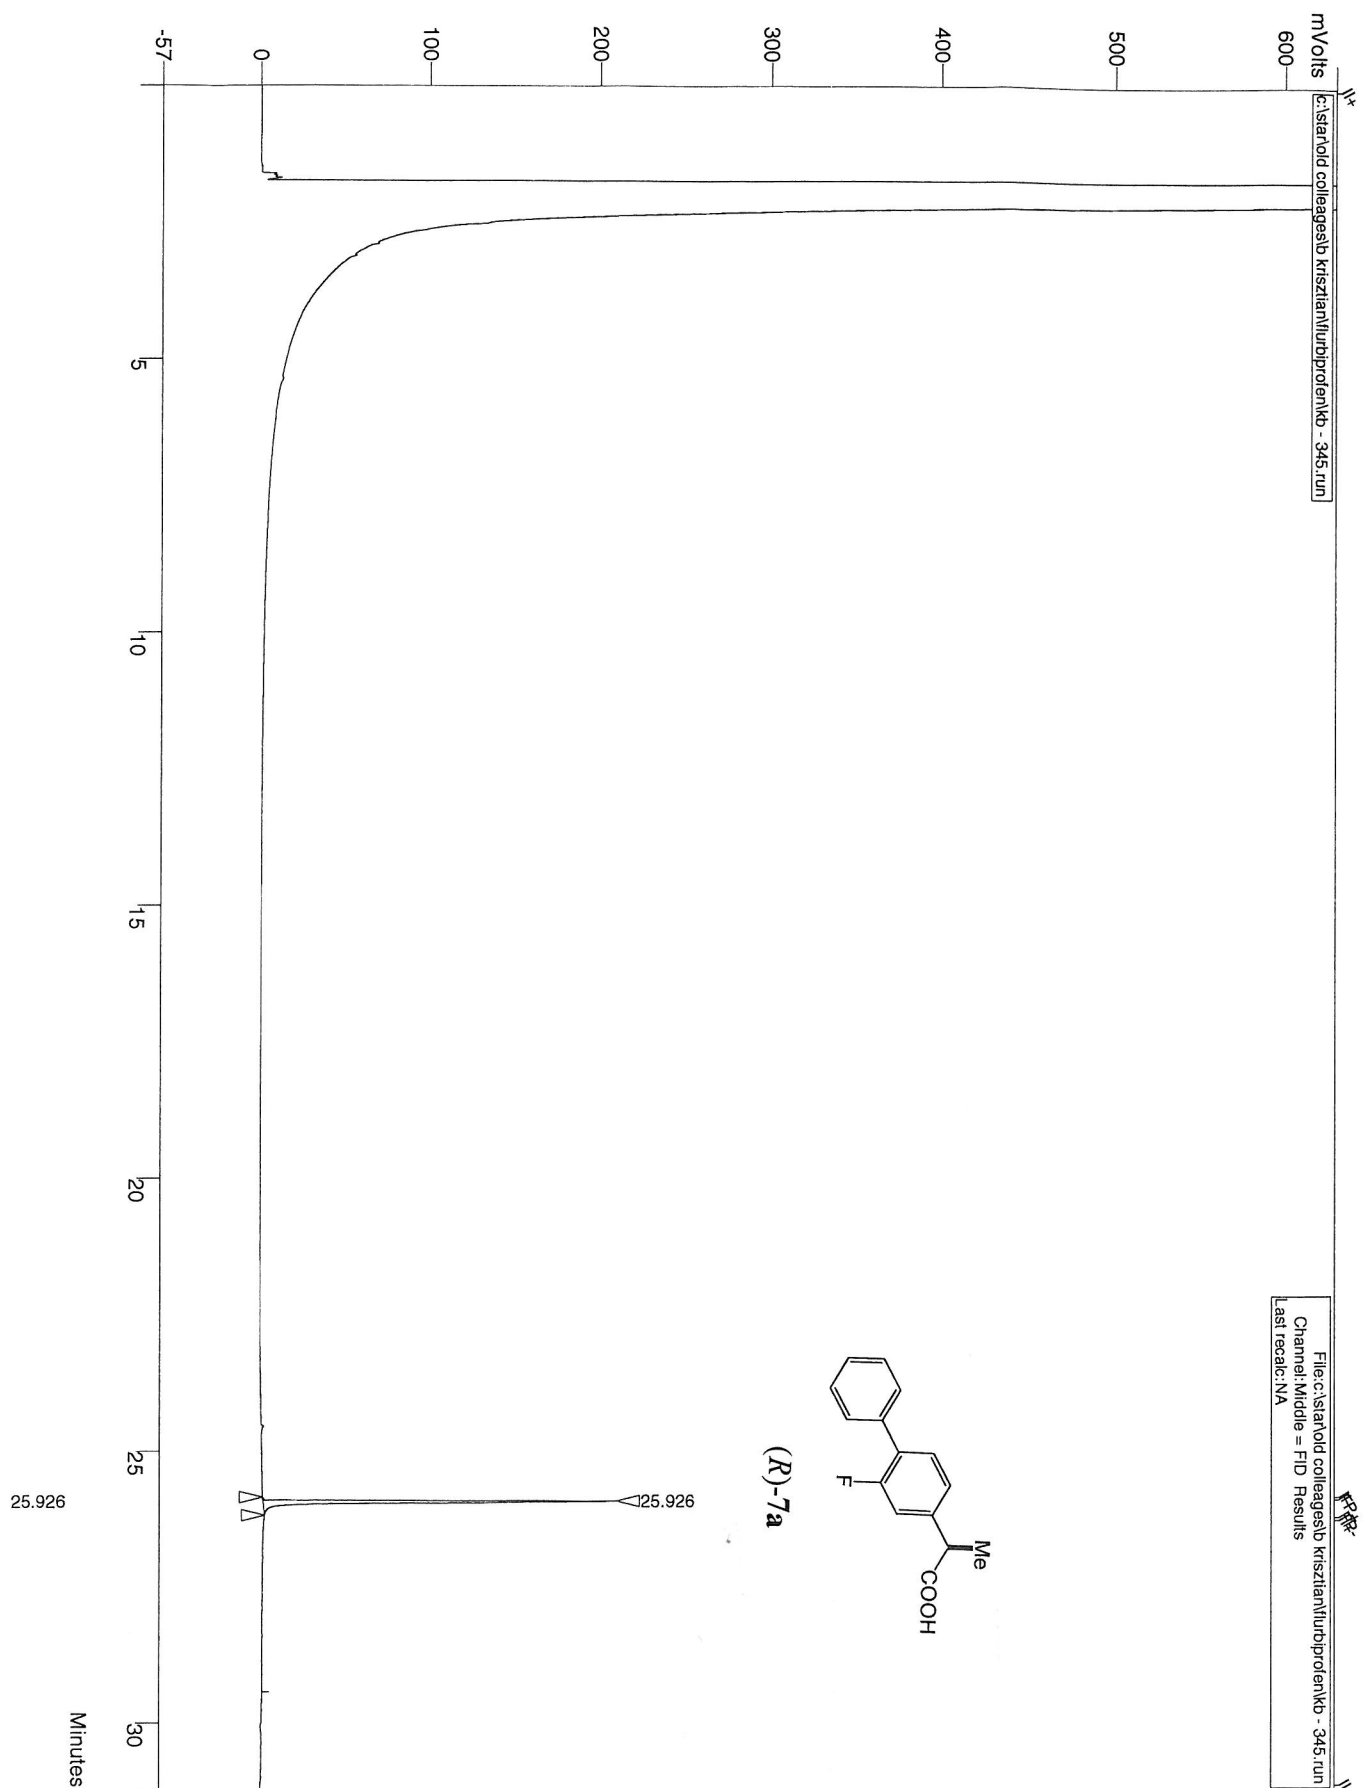

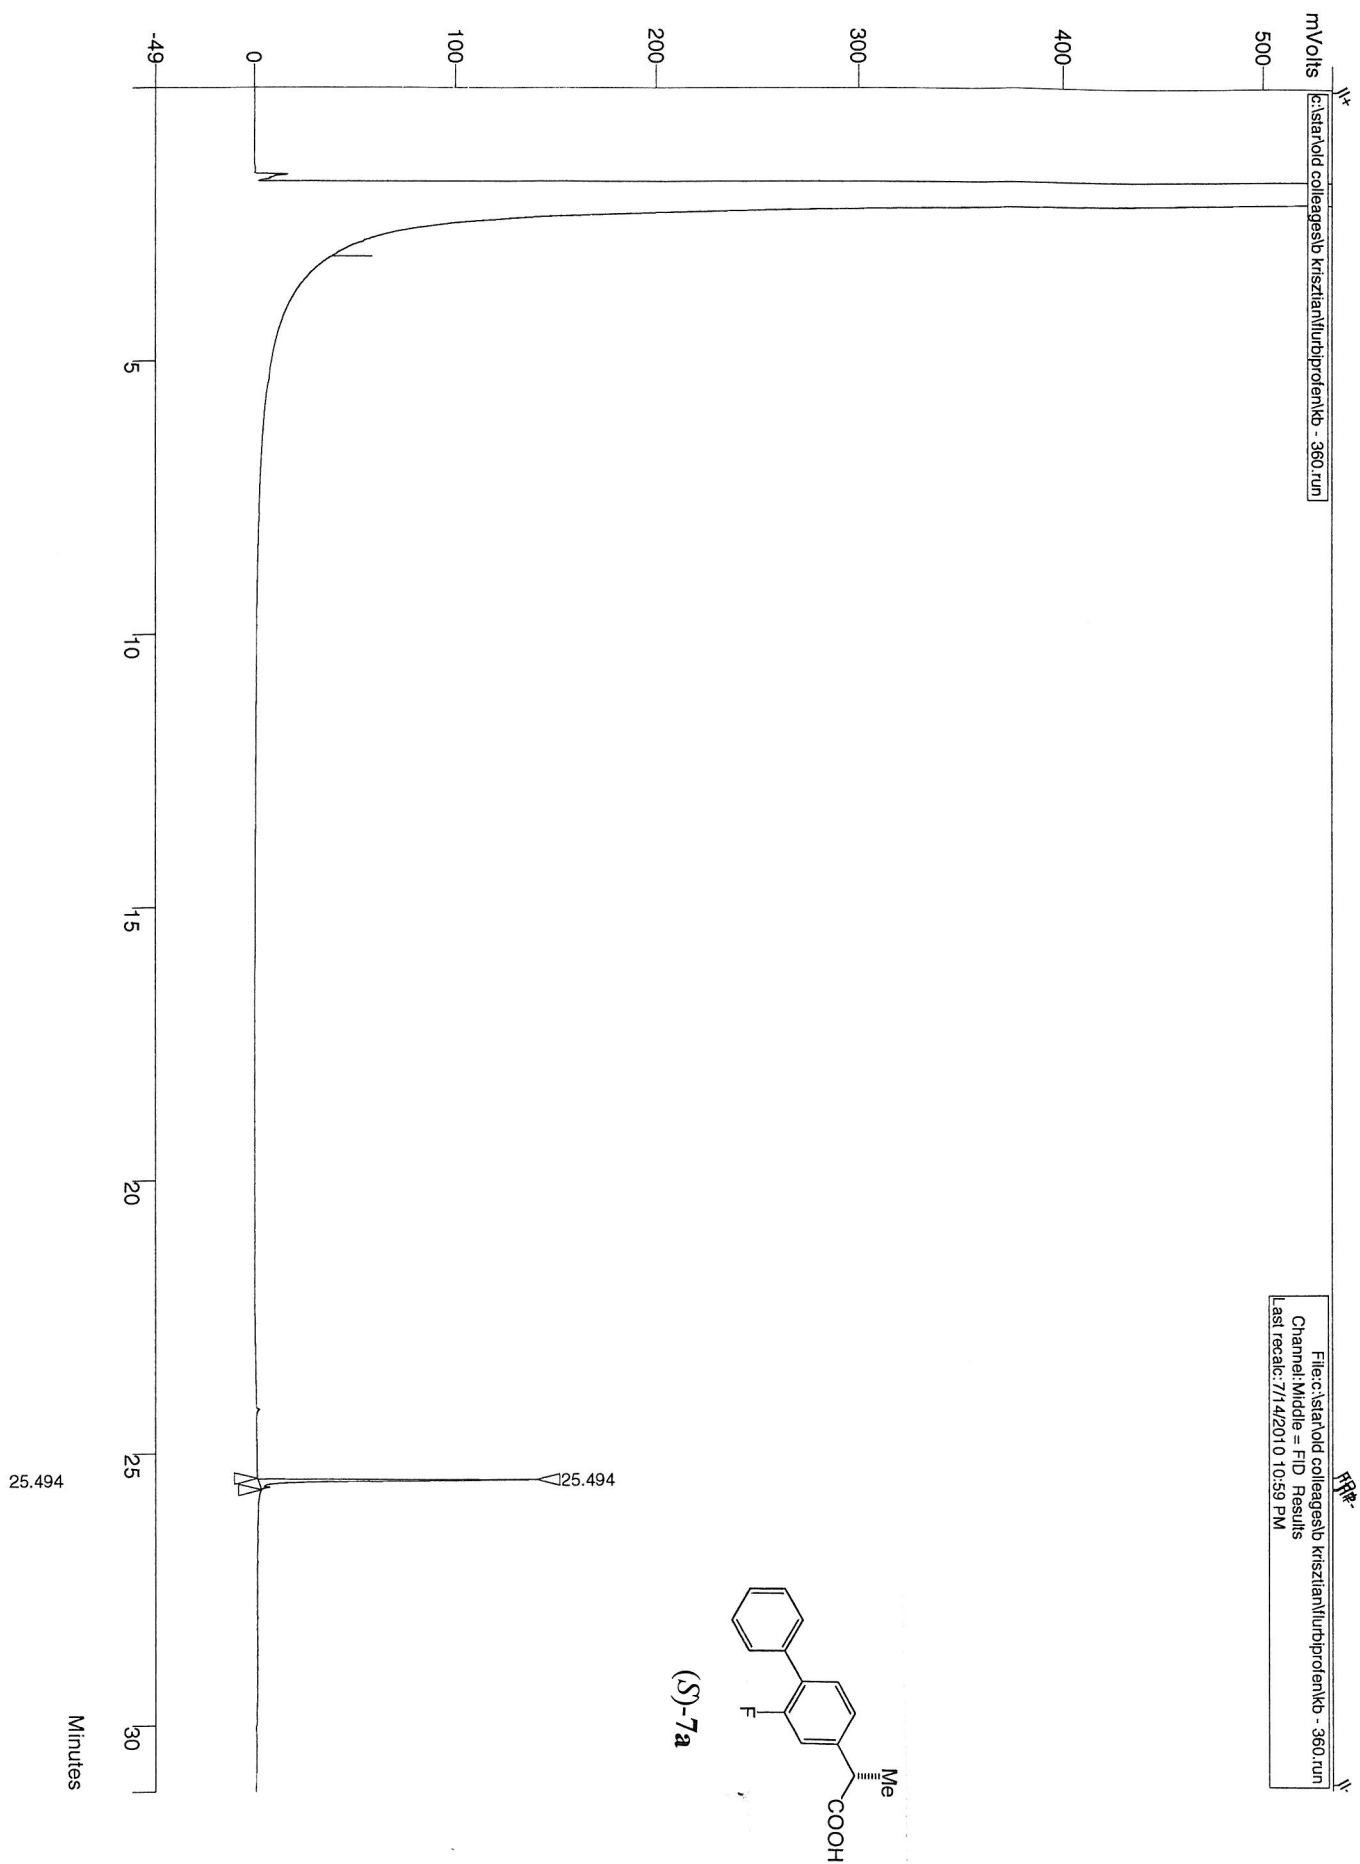

Supplement: Supplementary file 1 [file 4397392]
